# Supplementary material for: Acetylation makes the difference: a joint experimental and theoretical study on low-lying electronically excited states of 9H-adenine and 9-acetyladenine
Source: Royal Society of Chemistry journal article supplement (doi:10.1039/c2cp42859h), 2012-11-16
Supplement: c2cp42859h.molf [file c2cp42859h.molf]

[Molden Format]
[Title]
                                                                                
[Atoms] AU
 c     1    6 -.33303941495687E+01 -.16875611393201E+01 0.26709450683410E-01
 n     2    7 -.72283374029751E+00 -.23444107602690E+01 -.11369734675880E-01
 c     3    6 0.59829491028840E+00 -.73398536397050E-01 -.29663043374860E-01
 c     4    6 -.13318903020401E+01 0.18119634987403E+01 -.24648050186360E-01
 n     5    7 -.36558754903167E+01 0.81432877671737E+00 0.10890999689940E-01
 n     6    7 0.30293902807623E+01 0.42315930388299E+00 -.75872224129990E-01
 c     7    6 0.39215354556179E+01 0.28835061761943E+01 0.21040109331953E+00
 n     8    7 0.20871811337050E+01 0.46890319980055E+01 -.39156186397670E-01
 c     9    6 -.37516751146138E+00 0.43565904789429E+01 -.28479517878850E-01
 n    10    7 -.20255893027421E+01 0.63532750930351E+01 -.87369075479790E-01
 h    11    1 0.58708606275867E+01 0.33139446844642E+01 -.16735134438847E+00
 h    12    1 -.37926018244226E+01 0.58942547785120E+01 0.47054592626191E+00
 h    13    1 -.13573004528893E+01 0.80052788826793E+01 0.58880917122941E+00
 h    14    1 -.47533664819052E+01 -.31343207335702E+01 0.40164031614160E-01
 c    15    6 0.18480959128411E+00 -.48525118606870E+01 0.29424670206200E-02
 c    16    6 0.30040084714925E+01 -.51067712340790E+01 -.43982071229490E-01
 h    17    1 0.34732234123535E+01 -.71032870988448E+01 -.50902080136540E-01
 h    18    1 0.37827882272692E+01 -.41772035102974E+01 -.17101708016130E+01
 h    19    1 0.38376759387929E+01 -.41799650214761E+01 0.15970684026459E+01
 o    20    8 -.13228553468117E+01 -.66078540592510E+01 0.44171267767510E-01
[FREQ]
 0.00000000000000E+00
 0.00000000000000E+00
 0.00000000000000E+00
 0.00000000000000E+00
 0.00000000000000E+00
 0.00000000000000E+00
 0.73790000000000E+02
 0.85470000000000E+02
 0.15575000000000E+03
 0.16612000000000E+03
 0.19050000000000E+03
 0.22234000000000E+03
 0.23124000000000E+03
 0.25703000000000E+03
 0.30914000000000E+03
 0.33581000000000E+03
 0.37292000000000E+03
 0.41377000000000E+03
 0.41658000000000E+03
 0.44530000000000E+03
 0.51973000000000E+03
 0.54127000000000E+03
 0.54797000000000E+03
 0.55796000000000E+03
 0.58356000000000E+03
 0.59773000000000E+03
 0.61018000000000E+03
 0.63156000000000E+03
 0.66491000000000E+03
 0.70693000000000E+03
 0.79597000000000E+03
 0.91273000000000E+03
 0.96174000000000E+03
 0.99475000000000E+03
 0.10373200000000E+04
 0.10486400000000E+04
 0.11017600000000E+04
 0.11562200000000E+04
 0.11905300000000E+04
 0.12229600000000E+04
 0.12563000000000E+04
 0.12818600000000E+04
 0.13025500000000E+04
 0.13401600000000E+04
 0.13965800000000E+04
 0.14070400000000E+04
 0.14596400000000E+04
 0.14822600000000E+04
 0.15046300000000E+04
 0.15420600000000E+04
 0.16134000000000E+04
 0.16298300000000E+04
 0.16856300000000E+04
 0.30694400000000E+04
 0.31465200000000E+04
 0.32017200000000E+04
 0.32869000000000E+04
 0.33199000000000E+04
 0.35515100000000E+04
 0.36864000000000E+04
[FR-COORD]
 c  -.33303941495687E+01 -.16875611393201E+01 0.26709450683410E-01
 n  -.72283374029751E+00 -.23444107602690E+01 -.11369734675880E-01
 c  0.59829491028840E+00 -.73398536397050E-01 -.29663043374860E-01
 c  -.13318903020401E+01 0.18119634987403E+01 -.24648050186360E-01
 n  -.36558754903167E+01 0.81432877671737E+00 0.10890999689940E-01
 n  0.30293902807623E+01 0.42315930388299E+00 -.75872224129990E-01
 c  0.39215354556179E+01 0.28835061761943E+01 0.21040109331953E+00
 n  0.20871811337050E+01 0.46890319980055E+01 -.39156186397670E-01
 c  -.37516751146138E+00 0.43565904789429E+01 -.28479517878850E-01
 n  -.20255893027421E+01 0.63532750930351E+01 -.87369075479790E-01
 h  0.58708606275867E+01 0.33139446844642E+01 -.16735134438847E+00
 h  -.37926018244226E+01 0.58942547785120E+01 0.47054592626191E+00
 h  -.13573004528893E+01 0.80052788826793E+01 0.58880917122941E+00
 h  -.47533664819052E+01 -.31343207335702E+01 0.40164031614160E-01
 c  0.18480959128411E+00 -.48525118606870E+01 0.29424670206200E-02
 c  0.30040084714925E+01 -.51067712340790E+01 -.43982071229490E-01
 h  0.34732234123535E+01 -.71032870988448E+01 -.50902080136540E-01
 h  0.37827882272692E+01 -.41772035102974E+01 -.17101708016130E+01
 h  0.38376759387929E+01 -.41799650214761E+01 0.15970684026459E+01
 o  -.13228553468117E+01 -.66078540592510E+01 0.44171267767510E-01
[FR-NORM-COORD]
 vibration    1
 -.54115952600000E-01 0.23830098730000E+00 -.76627432300000E-01
 -.70387979300000E-01 0.17231291000000E+00 -.52626107000000E-01
 -.13245898800000E-01 0.13889301100000E+00 -.74763129000000E-01
 0.34073726100000E-01 0.18743390720000E+00 -.11095908860000E+00
 0.88098422000000E-02 0.24626679310000E+00 -.11149827900000E+00
 -.50329370000000E-03 0.77229603600000E-01 -.66993250300000E-01
 0.59600934700000E-01 0.58594986900000E-01 -.94149383400000E-01
 0.10641407520000E+00 0.10137594970000E+00 -.12872963510000E+00
 0.98002262300000E-01 0.16335622000000E+00 -.13884522640000E+00
 0.14849382360000E+00 0.20402936210000E+00 -.17486071210000E+00
 0.72634628800000E-01 0.46637075000000E-02 -.88344500600000E-01
 0.13368180400000E+00 0.25575512850000E+00 -.17921593910000E+00
 0.18600209450000E+00 0.19615252340000E+00 -.19268706450000E+00
 -.90529198200000E-01 0.27421486160000E+00 -.65946971200000E-01
 -.13346089570000E+00 0.14970679720000E+00 -.14246574100000E-01
 -.13957016830000E+00 0.78287101900000E-01 0.56976303000000E-02
 -.18967010630000E+00 0.66412046800000E-01 0.34757767800000E-01
 -.10641697270000E+00 0.36781708300000E-01 -.19623883000000E-02
 -.12595425270000E+00 0.78966235000000E-01 -.16029194000000E-02
 -.17778740340000E+00 0.18811349110000E+00 0.00000000000000E+00
 vibration    2
 -.17278933000000E-02 0.41503100000000E-04 0.24834731040000E+00
 -.15635169000000E-02 0.19160695000000E-02 0.22726790010000E+00
 -.50234986000000E-02 0.29102708000000E-02 0.10081524190000E+00
 -.75063490000000E-02 0.49236370000000E-03 0.54208812200000E-01
 -.54560371000000E-02 -.11071554000000E-02 0.14338279320000E+00
 -.65940002000000E-02 0.41819141000000E-02 0.31855032900000E-01
 -.44396942000000E-02 0.18131081200000E-01 -.94743364400000E-01
 -.11722545300000E-01 0.45252793000000E-02 -.13964807380000E+00
 -.11061805900000E-01 0.16309981000000E-02 -.77382250000000E-01
 -.14929319100000E-01 -.32455144000000E-02 -.13433342490000E+00
 -.12313291000000E-01 0.40022033000000E-02 -.15147314650000E+00
 -.35423184000000E-02 0.19143347000000E-01 -.79848575000000E-01
 -.41500141000000E-02 0.27733659200000E-01 -.22067367880000E+00
 0.51103100000000E-03 -.13071848000000E-02 0.34011531840000E+00
 0.21440782000000E-02 0.37942726000000E-02 0.32128203240000E+00
 0.15870529000000E-02 0.55651140000000E-02 0.27822102160000E+00
 0.41852477000000E-02 0.58994126000000E-02 0.35794337050000E+00
 -.31815970100000E-01 -.67452870100000E-01 0.22187160720000E+00
 0.31965404600000E-01 0.79671536700000E-01 0.22093592400000E+00
 0.53408113000000E-02 0.35646290000000E-02 0.42840373780000E+00
 vibration    3
 -.28421094700000E-01 -.13567071600000E-01 -.17071037460000E+00
 -.15430110300000E-01 0.28929514600000E-01 -.14170522600000E-01
 -.51564023400000E-01 0.50466376100000E-01 0.49947339700000E-01
 -.82744968000000E-01 0.18874065600000E-01 -.74091786500000E-01
 -.68482334700000E-01 -.18991625400000E-01 -.20437044390000E+00
 -.56992806100000E-01 0.90024555500000E-01 0.18942255800000E+00
 -.11406491770000E+00 0.10631071010000E+00 0.22731298850000E+00
 -.12902936850000E+00 0.74802903400000E-01 0.10935187920000E+00
 -.12420835090000E+00 0.34525375400000E-01 -.32911269900000E-01
 -.15347060150000E+00 0.71434436000000E-02 -.14121613950000E+00
 -.98994259500000E-01 0.13604161400000E+00 0.33896002250000E+00
 -.17862390780000E+00 -.18549422100000E-01 -.24201958500000E+00
 -.22013397670000E+00 0.22037380200000E-01 -.11171866490000E+00
 -.55072632000000E-02 -.36800638400000E-01 -.24560214600000E+00
 0.24821096300000E-01 0.43882642800000E-01 0.53619052100000E-01
 0.31734592500000E-01 0.89794816900000E-01 0.22020396280000E+00
 0.64848096500000E-01 0.97441428000000E-01 0.25933260840000E+00
 0.11408312230000E+00 0.92830881000000E-01 0.26038764300000E+00
 -.79554109200000E-01 0.11302824720000E+00 0.26361815610000E+00
 0.51163785700000E-01 0.19423651700000E-01 -.24431969700000E-01
 vibration    4
 -.17552148450000E+00 0.16525023500000E-01 0.11739551020000E+00
 -.17405296390000E+00 0.28032916300000E-01 0.19449645800000E-01
 -.18440345310000E+00 0.33853918600000E-01 -.54097407000000E-02
 -.19228585640000E+00 0.25555866300000E-01 0.80399849500000E-01
 -.18677180200000E+00 0.15284242700000E-01 0.15263735500000E+00
 -.18815094210000E+00 0.44684857500000E-01 -.86179739900000E-01
 -.18860021340000E+00 0.45775441500000E-01 -.94152539000000E-01
 -.20509375230000E+00 0.40308281600000E-01 -.12472308600000E-01
 -.20329730960000E+00 0.29681709100000E-01 0.70957689700000E-01
 -.21390284040000E+00 0.23187278900000E-01 0.14798781740000E+00
 -.20372426050000E+00 0.57700466000000E-01 -.15860929300000E+00
 -.19232095770000E+00 0.10327976100000E-01 0.20576144890000E+00
 -.19718539590000E+00 0.19612571700000E-01 0.14019896590000E+00
 -.16886432860000E+00 0.10314724000000E-01 0.15367595870000E+00
 -.16282906680000E+00 0.31776407500000E-01 -.36323806700000E-01
 -.16339243080000E+00 0.44273054000000E-01 -.13788313590000E+00
 -.15510190580000E+00 0.46344476300000E-01 -.17337288470000E+00
 -.22595959380000E+00 0.63449224200000E-01 -.15642874870000E+00
 -.10964414550000E+00 0.32228197000000E-01 -.15838521620000E+00
 -.15387619130000E+00 0.24939934500000E-01 0.00000000000000E+00
 vibration    5
 0.11517363330000E+00 0.19929872400000E-01 0.80248551700000E-01
 0.13194621250000E+00 0.91083176000000E-01 0.14257778000000E-02
 0.69590814400000E-01 0.12712879030000E+00 -.26971075400000E-01
 0.18412370600000E-01 0.74561921500000E-01 0.37576033800000E-01
 0.46605194600000E-01 0.11139527200000E-01 0.10081133830000E+00
 0.54727970600000E-01 0.19351428680000E+00 -.95545153100000E-01
 -.39149937000000E-02 0.21653215080000E+00 -.11061429090000E+00
 -.60331255400000E-01 0.16770220190000E+00 -.49210832400000E-01
 -.50970514000000E-01 0.10062337510000E+00 0.21000390700000E-01
 -.10703985090000E+00 0.55955589200000E-01 0.77896296500000E-01
 -.26629861500000E-01 0.27127187070000E+00 -.16545597610000E+00
 -.78301978100000E-01 0.53804893000000E-02 0.12730379160000E+00
 -.13232661910000E+00 0.71151613100000E-01 0.65761887100000E-01
 0.15494987230000E+00 -.18866747700000E-01 0.11526303430000E+00
 0.20063988550000E+00 0.11572815450000E+00 -.36112568100000E-01
 0.20619540680000E+00 0.19268200470000E+00 -.11931250320000E+00
 0.26034428660000E+00 0.20548591810000E+00 -.14182009530000E+00
 0.13238369390000E+00 0.22126623930000E+00 -.13786507490000E+00
 0.22873997870000E+00 0.20810416490000E+00 -.13947521640000E+00
 0.24962511230000E+00 0.74502898800000E-01 0.00000000000000E+00
 vibration    6
 -.52428449000000E-02 -.11452865170000E+00 -.95777057800000E-01
 0.33021950000000E-02 -.80021705900000E-01 -.10586568130000E+00
 -.27707798900000E-01 -.62515207400000E-01 -.17204940900000E+00
 -.53254334300000E-01 -.88601666300000E-01 -.19739847790000E+00
 -.39363023800000E-01 -.11931838980000E+00 -.15127653930000E+00
 -.34900843500000E-01 -.30594630000000E-01 -.20746584340000E+00
 -.65503379500000E-01 -.11768376900000E-01 -.27389609350000E+00
 -.92455105100000E-01 -.42524833600000E-01 -.29830957620000E+00
 -.87837508200000E-01 -.75703118700000E-01 -.26643691580000E+00
 -.11552016980000E+00 -.99490406400000E-01 -.29713240060000E+00
 -.75040406200000E-01 0.58353685000000E-02 -.30305126310000E+00
 -.10383360560000E+00 -.11039337270000E+00 -.26908937940000E+00
 -.13133644860000E+00 -.74557994300000E-01 -.34241424260000E+00
 0.14529832000000E-01 -.13353126660000E+00 -.47930413700000E-01
 0.37491969500000E-01 -.67363898500000E-01 -.55912518100000E-01
 0.40484982800000E-01 -.30191228500000E-01 -.77513159100000E-01
 0.67521910300000E-01 -.23983501700000E-01 -.35272559400000E-01
 0.11574313300000E-01 -.58699014100000E-01 -.10693057180000E+00
 0.43947838900000E-01 0.19617431900000E-01 -.10740245700000E+00
 0.61725504700000E-01 -.86864851200000E-01 0.00000000000000E+00
 vibration    7
 0.45839521000000E-02 0.23632686000000E-02 0.16381199550000E+00
 0.27384994000000E-02 0.14214806000000E-02 0.15711854160000E+00
 0.38555271000000E-02 0.22389175000000E-02 0.15680308540000E+00
 0.40795085000000E-02 -.88602650000000E-03 0.12172162730000E+00
 -.11267700000000E-03 -.33142390000000E-02 0.13137508160000E+00
 0.43071708000000E-02 -.42087080000000E-03 0.18426445970000E+00
 -.10317966000000E-02 0.14511267800000E-01 0.13509271000000E+00
 -.20277022000000E-02 -.26230040000000E-03 -.47887197400000E-01
 -.11749922000000E-02 -.20556940000000E-02 -.76028961000000E-01
 0.12557271000000E-02 -.95954420000000E-02 -.31710970360000E+00
 -.19049547000000E-02 -.23152010000000E-02 0.10354996490000E+00
 -.16917138500000E-01 0.50637158300000E-01 -.32620259150000E+00
 -.16680469000000E-01 0.62741821400000E-01 -.47640311950000E+00
 0.58383333000000E-02 0.94276960000000E-03 0.18899221060000E+00
 -.23289383000000E-02 -.29108840000000E-02 -.76150448700000E-01
 -.54227244000000E-02 -.44344109000000E-02 -.22530493440000E+00
 -.83434918000000E-02 -.45462309000000E-02 -.37055248290000E+00
 -.90297456200000E-01 0.96192534100000E-01 -.20892213880000E+00
 0.79025359800000E-01 -.10281014020000E+00 -.21297798870000E+00
 -.42112792000000E-02 -.23239218000000E-02 -.16238431580000E+00
 vibration    8
 -.19273153000000E-02 -.30806863000000E-02 0.62781208100000E-01
 -.73746150000000E-03 -.35060078000000E-02 0.54783163200000E-01
 -.13559311000000E-02 -.35489451000000E-02 0.60721678800000E-01
 -.13704135000000E-02 0.49064960000000E-03 0.97481377500000E-01
 0.36686106000000E-02 0.20146065000000E-02 0.10341271000000E+00
 -.56848929000000E-02 0.27617989000000E-02 -.36269606300000E-01
 0.63872019000000E-02 0.67781910000000E-02 -.18317321470000E+00
 0.94691320000000E-03 0.18134251000000E-02 -.10100548460000E+00
 0.14668315000000E-02 0.13087208000000E-02 0.33646546000000E-02
 -.30516038000000E-02 -.10728590000000E-03 0.10424146500000E-01
 0.10175874000000E-02 -.45077940000000E-02 -.21427079430000E+00
 0.21817224900000E-01 0.15816171600000E-01 0.10237309950000E+00
 0.25325609100000E-01 0.18379889700000E-01 -.62591845600000E-01
 -.33252475000000E-02 -.11002825000000E-02 0.74820670500000E-01
 -.11729499000000E-02 -.21753877000000E-02 -.33019061500000E-01
 0.57479405000000E-02 0.29023996000000E-02 0.33322824590000E+00
 0.10064548200000E-01 0.37398496000000E-02 0.37894132360000E+00
 0.21811637120000E+00 0.80723706000000E-02 0.43350314280000E+00
 -.20561890770000E+00 -.18820444000000E-02 0.44185933530000E+00
 -.58298918000000E-02 -.70406225000000E-02 -.35646971090000E+00
 vibration    9
 0.12440302370000E+00 -.29971633000000E-02 0.21243758700000E-01
 0.12247294120000E+00 0.16074363100000E-01 -.26928112400000E-01
 0.12227084360000E+00 0.33261877500000E-01 -.36338683700000E-01
 0.84077634600000E-01 -.88199761000000E-02 -.96374340000000E-02
 0.85237206600000E-01 -.27721358800000E-01 0.32836743500000E-01
 0.11244907170000E+00 0.10063292530000E+00 -.52277553100000E-01
 0.13003132600000E-01 0.15294057510000E+00 0.11070750540000E+00
 -.48454558600000E-01 0.11726088960000E+00 -.45305347800000E-01
 -.31574889600000E-01 0.17633355000000E-01 -.19086922700000E-01
 -.15768830350000E+00 -.97556989700000E-01 0.20526726400000E-01
 -.28717357200000E-01 0.22127066700000E+00 -.54476121200000E-01
 -.15016655870000E+00 -.23946472470000E+00 -.74289524600000E-01
 -.29967102240000E+00 -.47608295200000E-01 0.35338885000000E-01
 0.14905138980000E+00 -.26918287800000E-01 0.44161993400000E-01
 -.46681827700000E-01 -.49452528100000E-01 -.56048578000000E-02
 -.74851126700000E-01 -.29142789220000E+00 0.22208321000000E-01
 -.23572119660000E+00 -.32847244630000E+00 0.23970617600000E-01
 0.16575816300000E-01 -.34629856150000E+00 0.33809527800000E-01
 -.22146218100000E-01 -.35889803950000E+00 0.34024454200000E-01
 -.20697874470000E+00 0.87564659400000E-01 -.30730998000000E-02
 vibration   10
 0.14881821400000E-01 -.30266953300000E-01 -.70915333000000E-01
 0.35489966700000E-01 -.30131965100000E-01 0.23695232360000E+00
 0.25220870100000E-01 -.26745216500000E-01 0.20928492130000E+00
 0.91394788000000E-02 0.58023746000000E-02 -.75894829000000E-01
 0.66028012000000E-01 0.24750300600000E-01 -.26611922080000E+00
 0.93176800000000E-03 0.60148240000000E-01 0.30102114910000E+00
 -.23033199700000E-01 0.64794349100000E-01 -.49955110970000E+00
 0.84926687000000E-02 0.43785665800000E-01 0.67225640800000E-01
 0.11306386200000E-01 0.28976093700000E-01 0.30041741000000E-01
 -.57109488400000E-01 0.91241260000000E-02 0.82712591000000E-01
 0.84344327700000E-01 0.48551225800000E-01 0.14636253360000E+00
 0.23058724900000E-01 -.85542655900000E-01 0.27422702290000E+00
 -.66006725900000E-01 -.42580506500000E-01 0.22515982800000E+00
 0.39529147000000E-02 -.15148084200000E-01 -.18153531410000E+00
 -.90569691000000E-02 -.29137407600000E-01 0.54534783100000E-01
 -.15933005100000E-01 -.94314478600000E-01 -.11745526390000E+00
 -.63823851700000E-01 -.10510669260000E+00 -.29621453170000E+00
 -.89150409900000E-01 -.24294152000000E-02 -.10336613490000E+00
 0.11957547110000E+00 -.24937267770000E+00 -.96219878600000E-01
 -.57284123400000E-01 -.50855335000000E-02 -.14461884900000E-01
 vibration   11
 -.26121492000000E-02 0.18780085300000E-01 0.22829126500000E+00
 -.10907049200000E-01 0.21095801500000E-01 0.25248425470000E+00
 -.68865778000000E-02 0.16872096900000E-01 -.66160687300000E-01
 -.68281302000000E-02 -.28889121000000E-02 -.35315003650000E+00
 -.30215602800000E-01 -.33226630000000E-02 -.13286185310000E+00
 0.16103632400000E-01 -.49585303600000E-01 0.57595018000000E-02
 -.22068395000000E-02 -.24499444600000E-01 0.22757229370000E+00
 -.45954576000000E-02 -.26590259900000E-01 -.18132392210000E+00
 -.85524445000000E-02 -.10370927300000E-01 -.16281327130000E+00
 0.17281554200000E-01 0.57499549000000E-02 0.21394575940000E+00
 -.36398614100000E-01 -.32001040100000E-01 -.10053682300000E-01
 -.78064242000000E-02 -.85711923000000E-01 0.52755420900000E-01
 0.14211211300000E-01 -.10891437940000E+00 0.49277414660000E+00
 0.23774562000000E-02 0.11833360700000E-01 0.27487614170000E+00
 0.63658664000000E-02 0.17661191900000E-01 0.42445018500000E-01
 0.62400495000000E-02 0.41919267300000E-01 -.15474895500000E-01
 0.15085203400000E-01 0.44920971000000E-01 -.28510348630000E+00
 -.15742673100000E-01 0.28019085680000E+00 0.10809035840000E+00
 0.10979351300000E-01 -.17123934260000E+00 0.10053617870000E+00
 0.22757105800000E-01 0.67860844000000E-02 -.11001938870000E+00
 vibration   12
 0.42127810000000E-03 0.77487730000000E-03 0.28323160800000E-01
 0.94180020000000E-03 0.46337760000000E-03 0.40407397300000E-01
 0.90056770000000E-03 -.64229000000000E-03 -.32453408000000E-02
 0.11992664000000E-02 -.28284470000000E-03 -.35569379600000E-01
 0.21082040000000E-02 0.16688221000000E-02 -.11319880400000E-01
 0.11423809000000E-02 0.83798740000000E-03 -.50401596000000E-02
 0.10483670000000E-03 -.91057100000000E-03 0.32613012000000E-02
 0.72416360000000E-03 -.21091120000000E-03 0.27076148600000E-01
 0.78013460000000E-03 0.45075510000000E-03 -.39924708000000E-02
 -.30656476000000E-02 -.79045750000000E-03 -.16653940000000E-03
 0.25514218000000E-02 0.30202656000000E-02 0.22225058500000E-01
 -.50763989000000E-02 -.15190485600000E-01 -.17029315000000E-01
 -.14632955200000E-01 -.11347941800000E-01 0.37594264300000E-01
 0.89628500000000E-04 0.12610010000000E-02 0.33064181500000E-01
 -.29201210000000E-03 0.12463930000000E-03 0.11089174700000E-01
 -.76016110000000E-03 -.56397750000000E-03 -.44813555000000E-02
 0.86488325000000E-02 -.12519560000000E-03 0.52374501450000E+00
 -.97381771200000E-01 -.49121763000000E+00 -.32657253390000E+00
 0.85823540900000E-01 0.49186637940000E+00 -.32980776380000E+00
 -.21289086000000E-02 0.43344200000000E-03 -.37568591700000E-01
 vibration   13
 -.64743604000000E-02 -.73732516000000E-02 0.23530432270000E+00
 0.78746160000000E-03 -.23554204000000E-01 -.10736046600000E-01
 -.26281314000000E-02 -.26402434900000E-01 -.20689796160000E+00
 0.31959831000000E-02 0.70698631000000E-02 -.23072448580000E+00
 0.39643561500000E-01 0.29112174500000E-01 0.83850150900000E-01
 -.19180471600000E-01 0.34693788400000E-01 -.64520586400000E-01
 -.34596470900000E-01 -.80545622000000E-02 -.13789891860000E+00
 0.20875321000000E-01 0.20188324800000E-01 0.36886734320000E+00
 0.17989828500000E-01 0.16000373100000E-01 0.14666886700000E-01
 -.14218671300000E-01 0.14094626900000E-01 -.15197093780000E+00
 0.74758469300000E-01 0.27446941600000E-01 0.54460056170000E+00
 -.26387230900000E-01 -.64295320500000E-01 -.23539889780000E+00
 -.10993588540000E+00 -.47583369600000E-01 0.10348873520000E+00
 -.20980873300000E-01 0.10951005000000E-01 0.34127577390000E+00
 -.14038559000000E-02 -.13932434400000E-01 -.26323062300000E-01
 0.24328897000000E-02 -.15329570600000E-01 0.40345425100000E-01
 -.12267333000000E-02 -.15797605700000E-01 -.12228200650000E+00
 0.92898836400000E-01 0.13528516440000E+00 0.16626057490000E+00
 -.70384590700000E-01 -.18727536430000E+00 0.17753241350000E+00
 -.44434545000000E-02 -.20300212300000E-01 -.24989334400000E-01
 vibration   14
 -.40650528400000E-01 0.95256791500000E-01 -.14662318600000E-01
 -.61244204800000E-01 0.96565042000000E-02 -.16106463000000E-02
 0.36699984400000E-01 -.44432602200000E-01 0.14990148600000E-01
 0.10424406160000E+00 -.13624688400000E-01 0.19438887900000E-01
 0.64311421100000E-01 0.11071611070000E+00 0.10373174000000E-02
 0.40510923300000E-01 -.38991461600000E-01 0.27725172000000E-02
 0.41781441900000E-01 -.32519854200000E-01 -.16725886800000E-01
 0.66510229900000E-01 0.17065276600000E-01 -.77809457000000E-02
 0.74014036300000E-01 -.37448989600000E-01 0.66762608000000E-02
 -.14807480130000E+00 -.24436112100000E+00 0.61673439000000E-02
 0.49233972700000E-01 -.54369255300000E-01 -.12491567000000E-02
 -.13669864740000E+00 -.54320863380000E+00 -.19961078430000E+00
 -.46533574470000E+00 -.14465960700000E+00 0.67396828900000E-01
 -.94920477600000E-01 0.14859791490000E+00 -.21531884800000E-01
 -.54352371100000E-01 0.29326926600000E-01 0.16849042000000E-02
 -.43665094400000E-01 0.18023468540000E+00 -.26362482000000E-02
 0.89976156700000E-01 0.21201347520000E+00 -.16710188300000E-01
 -.10249166170000E+00 0.24431577080000E+00 0.53447987000000E-02
 -.99489623000000E-01 0.22320895040000E+00 0.19065852000000E-02
 -.75208610000000E-02 -.10392789000000E-01 0.32673507000000E-02
 vibration   15
 -.35330912000000E-02 0.43810160000000E-02 0.70005678600000E-01
 -.36093383000000E-02 -.10502998600000E-01 -.30311935140000E+00
 -.53756400000000E-03 -.93211977000000E-02 -.99090306400000E-01
 -.16295087000000E-02 0.12297586200000E-01 -.88662003600000E-01
 0.24358402300000E-01 0.34036057500000E-01 0.19086624300000E+00
 0.48437608000000E-02 -.20424543900000E-01 0.40170752990000E+00
 -.45699872300000E-01 -.21608361000000E-02 -.65295082400000E-01
 0.21817493000000E-02 -.22931628000000E-01 -.18380936520000E+00
 -.78760850000000E-03 0.23273839600000E-01 -.12070609030000E+00
 -.18525581200000E-01 0.36489532500000E-01 0.71996872300000E-01
 0.62613533000000E-01 -.38624621700000E-01 0.50823844740000E+00
 0.20620922100000E-01 -.89710033500000E-01 0.10339606770000E+00
 -.36088779100000E-01 -.87223717900000E-01 0.39743514730000E+00
 -.16417769500000E-01 0.20535114500000E-01 0.22926355260000E+00
 0.65247301000000E-02 -.41953610000000E-03 -.10875874890000E+00
 0.11094793800000E-01 -.12432127300000E-01 0.22908560800000E-01
 -.42859100000000E-02 -.17077546900000E-01 0.21820791150000E+00
 0.11531149720000E+00 -.16094554100000E+00 -.10983214600000E-01
 -.68467138800000E-01 0.11163604770000E+00 -.52834769000000E-02
 0.13237032000000E-01 -.98470495000000E-02 0.46226064800000E-01
 vibration   16
 0.78876161800000E-01 -.60360367000000E-01 0.18421920000000E-02
 0.95014982700000E-01 0.14910831790000E+00 -.36216524000000E-02
 0.28123398600000E-01 0.93099869000000E-01 -.28843802300000E-01
 -.73952383200000E-01 -.49497683600000E-01 -.31821344700000E-01
 -.73048057400000E-01 -.96902600500000E-01 0.11548007200000E-01
 0.94532428700000E-01 -.17991015370000E+00 0.76977194100000E-01
 0.98329967000000E-01 -.15626473140000E+00 -.85554260400000E-01
 -.83520003100000E-01 -.32672009400000E+00 0.77847958800000E-01
 -.99833456800000E-01 -.75211759400000E-01 0.68140953600000E-01
 -.71028070500000E-01 -.27530531000000E-01 -.62342685400000E-01
 -.34590996000000E-02 -.33651904200000E-01 -.48185387800000E+00
 -.74847971300000E-01 -.98244020500000E-01 -.11428454490000E+00
 -.15100826070000E+00 -.10206057230000E+00 0.20614361050000E+00
 0.19468860520000E+00 -.17092624120000E+00 -.21130386000000E-02
 0.77059709900000E-01 0.23582501810000E+00 -.10816550700000E-01
 0.63541098300000E-01 0.64668428600000E-01 0.91023910000000E-03
 -.76080886000000E-01 0.31312132700000E-01 -.11659397800000E-01
 0.13473758960000E+00 0.35016311100000E-01 0.20431958700000E-01
 0.10642452190000E+00 0.46187462000000E-02 0.11560906900000E-01
 -.10414206650000E+00 0.40373445210000E+00 0.18829110000000E-03
 vibration   17
 -.65447764800000E-01 0.10083552080000E+00 -.22952731800000E-01
 -.39841388000000E-01 0.37541773400000E-01 0.21386491600000E-01
 -.56043333600000E-01 0.29446588600000E-01 0.16702204400000E-01
 -.10813847900000E-01 0.69065090900000E-01 0.36857456900000E-01
 -.28000777300000E-01 0.11742677040000E+00 0.21165701000000E-02
 -.48894288300000E-01 -.63729956800000E-01 -.28878156900000E-01
 -.16898265800000E-01 -.79298001200000E-01 0.16397490000000E-02
 0.21625235200000E-01 -.27135237800000E-01 -.13313644900000E-01
 0.77044368000000E-02 0.56534319300000E-01 0.14316120100000E-01
 -.59490753200000E-01 0.11014275000000E-01 -.14083042700000E-01
 -.15353244600000E-01 -.10715457880000E+00 -.23062206000000E-01
 -.11673997000000E+00 -.19079616000000E+00 -.35307517280000E+00
 -.29646436670000E+00 -.33886215900000E-01 0.32983654380000E+00
 -.10332958590000E+00 0.13728958040000E+00 -.49700424000000E-01
 0.76459431900000E-01 0.43098843000000E-01 0.95301175000000E-02
 0.77661917200000E-01 -.19758081190000E+00 -.16139651000000E-02
 -.23887761960000E+00 -.27378061690000E+00 -.87135049000000E-02
 0.20372437770000E+00 -.32365232150000E+00 -.10424257500000E-01
 0.22294067290000E+00 -.33789984800000E+00 0.11100491000000E-02
 0.14754890930000E+00 -.11171028100000E-01 -.50247221000000E-02
 vibration   18
 -.26258654800000E-01 0.43762862400000E-01 0.36171661600000E-01
 -.19509374900000E-01 0.16381865000000E-01 -.19566761300000E-01
 -.10732348600000E-01 0.77842463000000E-02 -.24008989300000E-01
 0.54722509000000E-02 0.64395077000000E-02 -.56896805900000E-01
 -.10852029000000E-01 0.41215455500000E-01 -.18222388800000E-01
 -.92029466000000E-02 -.52708870000000E-02 0.37844134600000E-01
 0.24116145600000E-01 -.10349316700000E-01 0.14541462900000E-01
 -.34334760000000E-03 0.27437180000000E-03 0.26933610000000E-01
 0.45580483000000E-02 -.15071267900000E-01 0.77085923000000E-02
 -.46029077800000E-01 -.73929205500000E-01 0.15563789600000E-01
 -.14720638500000E-01 -.22640014900000E-01 -.21918582230000E+00
 0.10468200040000E+00 0.70834522900000E-01 0.60661307940000E+00
 0.14728414600000E+00 0.12981296370000E+00 -.67879693520000E+00
 -.38981528800000E-01 0.55890922200000E-01 0.52884001900000E-01
 0.14335495500000E-01 0.26090268100000E-01 -.17303209700000E-01
 0.14907668900000E-01 -.43493074900000E-01 0.28818273000000E-02
 -.81063432400000E-01 -.66595452700000E-01 0.21369903800000E-01
 0.75390021600000E-01 -.93079208600000E-01 0.47432705000000E-02
 0.35955229300000E-01 -.76049415400000E-01 0.10039161300000E-01
 0.41016895500000E-01 0.74035881000000E-02 0.32004003000000E-02
 vibration   19
 0.12913152400000E-01 0.52946149600000E-01 0.73814695000000E-02
 -.90488867000000E-02 -.32117452000000E-02 -.11608686400000E-01
 0.48148881000000E-01 0.13578871800000E-01 -.33856922000000E-01
 0.33718385400000E-01 0.97606206000000E-02 -.51125496600000E-01
 0.80056727000000E-02 0.23113142700000E-01 0.35746162000000E-02
 0.75744630200000E-01 -.36997546900000E-01 0.70297672500000E-01
 0.80197073400000E-01 0.38202745100000E-01 0.43428196000000E-02
 -.65084429900000E-01 -.46734369100000E-01 0.36611349300000E-01
 -.57254398600000E-01 0.46143400900000E-01 0.70960943800000E-01
 -.31926083500000E-01 0.90545351000000E-01 -.32845468700000E-01
 -.92758812700000E-01 0.93525020500000E-01 -.89322398940000E+00
 -.72756442300000E-01 0.85077752100000E-01 -.16241930800000E+00
 -.71796499600000E-01 0.34203503400000E-01 0.14727215400000E+00
 -.55244952000000E-02 0.67624071800000E-01 0.34126717200000E-01
 -.44744146200000E-01 -.68807640400000E-01 -.14837658800000E-01
 -.51555474100000E-01 0.89253535000000E-02 0.26902209000000E-02
 0.29932823700000E-01 0.28806156600000E-01 0.65480369000000E-02
 -.73262764300000E-01 0.53856863700000E-01 0.19288693800000E-01
 -.11308126950000E+00 0.52742482200000E-01 0.88521697000000E-02
 0.28600181400000E-01 -.12522057540000E+00 0.59307329000000E-02
 vibration   20
 -.32680529200000E-01 -.60422742300000E-01 0.30581911500000E-01
 -.11594409800000E-01 -.43719941000000E-02 -.30693252600000E-01
 -.76094816500000E-01 0.40930831100000E-01 -.19036557700000E-01
 -.89257521200000E-01 -.86186206000000E-02 -.58050096600000E-01
 -.98933997000000E-01 -.69116760300000E-01 0.11205093000000E-02
 -.12131509060000E+00 0.15815210420000E+00 0.80403040200000E-01
 0.11180595740000E+00 0.53480679500000E-01 -.10061902800000E-01
 0.88163856900000E-01 0.82550784200000E-01 0.27084100000000E-04
 0.94084001400000E-01 -.65864372300000E-01 0.67383059700000E-01
 0.12337466120000E+00 -.13219504940000E+00 0.37420373000000E-01
 0.33973078000000E-01 -.75922161600000E-01 -.60837488310000E+00
 -.72478497400000E-01 -.13065824660000E+00 -.62619591100000E+00
 -.76807439300000E-01 -.27728272100000E-01 -.57746322400000E-01
 0.71566297000000E-02 -.10111702590000E+00 0.50449399100000E-01
 0.11189986100000E-01 0.22880496200000E-01 -.24198302700000E-01
 0.12368756700000E-01 -.25391598100000E-01 0.14325802000000E-02
 -.40787039800000E-01 -.38089833400000E-01 0.23116374900000E-01
 0.63029636900000E-01 -.63292249500000E-01 0.45889021000000E-02
 0.92377170000000E-02 -.44782498700000E-01 0.14713728100000E-01
 -.97800710000000E-03 0.31968084900000E-01 0.72535993000000E-02
 vibration   21
 -.30454013000000E-01 0.31972793000000E-02 -.90078213600000E-01
 -.17218822800000E-01 0.11842095800000E-01 0.11964820100000E-01
 -.55671297000000E-02 0.99614990000000E-02 0.30517968400000E-01
 -.18906832200000E-01 -.17718197000000E-01 0.17319759500000E-01
 -.37837899800000E-01 -.47949817000000E-02 0.53705361800000E-01
 -.12553739400000E-01 0.53988194800000E-01 -.10289725700000E-01
 0.55285369300000E-01 0.51988299900000E-01 0.21278897700000E-01
 0.14648672200000E-01 -.61957990000000E-02 0.68688434900000E-01
 0.33945579300000E-01 -.51370208300000E-01 -.14765990750000E+00
 -.39296691000000E-02 -.12444682100000E-01 -.68830206000000E-01
 0.15219488200000E-01 0.39981804800000E-01 -.22466993640000E+00
 0.21866593760000E+00 -.18901722360000E+00 0.55686927930000E+00
 0.12095456000000E+00 -.30001256700000E+00 0.56107107360000E+00
 -.17980272900000E-01 -.67684697000000E-02 0.25628324060000E+00
 -.49814808000000E-02 0.10619967100000E-01 0.21004866100000E-01
 -.11577500000000E-01 -.97273892000000E-02 -.70251760000000E-03
 -.47071281300000E-01 -.17796802200000E-01 -.27605115200000E-01
 -.28305460400000E-01 -.10593908100000E-01 -.82610169000000E-02
 0.28689755800000E-01 -.36819893000000E-01 -.69222961000000E-02
 0.18203834700000E-01 -.20008879000000E-02 -.67386474000000E-02
 vibration   22
 -.29837158100000E-01 0.39472971300000E-01 -.20131606190000E+00
 -.42457854000000E-02 0.35370041400000E-01 0.90597265900000E-01
 0.43587478100000E-01 0.39919658300000E-01 -.20929663700000E+00
 -.27900872500000E-01 -.37256254300000E-01 -.42986328100000E-01
 -.52661676800000E-01 0.43963684100000E-01 0.16352045290000E+00
 0.81427984800000E-01 0.75216706100000E-01 0.49222040800000E-01
 0.49424040900000E-01 0.64019594300000E-01 -.34331000100000E-01
 -.51343927300000E-01 -.97961531300000E-01 -.37231059100000E-01
 -.44823433500000E-01 -.75101354800000E-01 0.55063911300000E-01
 0.54276298800000E-01 -.56161242500000E-01 0.34092755000000E-01
 0.11067066620000E+00 0.16931242240000E+00 0.44141811580000E+00
 -.54206556000000E-01 0.10772589130000E+00 -.20999820140000E+00
 0.91470432100000E-01 0.48583347700000E-01 -.28689580290000E+00
 -.85917212000000E-02 0.18847540300000E-01 -.11654883170000E+00
 -.29123935200000E-01 0.30850900100000E-01 0.24383212590000E+00
 -.58558681700000E-01 -.11964242000000E-01 0.33298041000000E-02
 -.14550426770000E+00 -.31401900100000E-01 -.21541841480000E+00
 -.35060117730000E+00 0.17397869300000E-01 -.12326148350000E+00
 0.30766805950000E+00 -.11783424940000E+00 -.12937802690000E+00
 0.52054219800000E-01 -.51262408900000E-01 -.83073539700000E-01
 vibration   23
 -.49852957900000E-01 0.41753256200000E-01 0.16382232640000E+00
 -.25644633200000E-01 0.44416121000000E-01 -.21638456000000E-01
 0.56922451500000E-01 0.29619077900000E-01 0.55553830500000E-01
 -.25183458900000E-01 -.60822639600000E-01 0.39506484900000E-01
 -.65613292000000E-01 0.46737418800000E-01 -.74847381200000E-01
 0.97511607200000E-01 0.77865779200000E-01 -.34965712800000E-01
 0.46353591800000E-01 0.10551636010000E+00 -.18392546700000E-01
 -.58268646200000E-01 -.98273425900000E-01 -.16707316900000E-01
 -.37648989500000E-01 -.11560810650000E+00 0.14602440100000E-01
 0.65850435500000E-01 -.48011702300000E-01 -.20208631800000E-01
 0.81627301000000E-01 0.22258203880000E+00 0.32314315870000E+00
 0.55676358200000E-01 0.13138732100000E-01 0.69569137000000E-02
 0.16336973990000E+00 -.16599107630000E+00 0.18136776320000E+00
 -.38027255300000E-01 0.19874144900000E-01 -.67855856320000E+00
 -.36826222700000E-01 0.46052175800000E-01 -.12127126540000E+00
 -.67179976800000E-01 -.14477463500000E-01 -.42128500000000E-03
 -.18415849470000E+00 -.42040861200000E-01 0.11907988720000E+00
 0.15842305700000E+00 -.10298200960000E+00 0.59748876900000E-01
 -.18842761430000E+00 -.27600689100000E-01 0.70796523900000E-01
 0.69977157500000E-01 -.38720120200000E-01 0.42051168100000E-01
 vibration   24
 -.18554209600000E-01 0.24547314400000E-01 -.53737409600000E-01
 -.14115408300000E-01 0.10977099700000E-01 -.20795741600000E-01
 0.32594501900000E-01 -.89638899000000E-02 0.98004144000000E-01
 0.11517839000000E-01 -.28872928500000E-01 -.99122160000000E-03
 -.18688380000000E-03 0.26335856100000E-01 -.29404123500000E-01
 0.48254613200000E-01 -.53189411000000E-02 -.24851095900000E-01
 -.21979996900000E-01 0.31634610500000E-01 -.21330411400000E-01
 -.51982453400000E-01 -.25535764000000E-01 0.30686452700000E-01
 -.40549874000000E-01 -.39008350200000E-01 -.51686078300000E-01
 0.51111106300000E-01 -.25193558900000E-01 0.61031320100000E-01
 -.18630098700000E-01 0.98848579700000E-01 0.82716578800000E-01
 -.96342689700000E-01 0.11561151460000E+00 -.33298485040000E+00
 0.72348853600000E-01 0.53124512900000E-01 -.18228250690000E+00
 -.14468214900000E-01 0.30236890600000E-01 0.86038409650000E+00
 -.91998321000000E-02 0.28926477500000E-01 -.52770350700000E-01
 -.17638650600000E-01 -.36419621000000E-02 -.17073410000000E-02
 -.80622238400000E-01 -.18749069800000E-01 0.44897087000000E-01
 0.79625710200000E-01 -.44170298500000E-01 0.22788724600000E-01
 -.56022221700000E-01 -.19832805800000E-01 0.28213844400000E-01
 0.26132182300000E-01 -.61692140000000E-03 0.15638642800000E-01
 vibration   25
 -.10636284540000E+00 0.43046105800000E-01 0.38122582300000E-01
 -.72066396600000E-01 -.66295943500000E-01 -.55578225700000E-01
 0.26500912500000E-01 -.16692606320000E+00 0.92530712000000E-02
 0.11386048680000E+00 -.89932778600000E-01 -.19025901400000E-01
 0.10439195130000E+00 0.61931120700000E-01 0.28837552300000E-01
 -.10269202800000E-01 -.38871808200000E-01 0.21447611100000E-01
 -.14416764640000E+00 0.73302507700000E-01 0.61954546000000E-02
 -.10639411040000E+00 0.87644710000000E-01 0.35391393500000E-01
 -.42451907200000E-01 -.93215975600000E-01 -.39549532700000E-01
 0.10351048360000E+00 -.18728573400000E-01 0.43864215000000E-02
 -.22984809660000E+00 0.75241589200000E-01 -.46061282950000E+00
 -.18896750000000E-03 0.18047302160000E+00 -.18038984460000E+00
 0.29275428040000E+00 -.14920212320000E+00 0.13285377150000E+00
 -.21326119410000E+00 0.14639189430000E+00 -.39468428550000E+00
 0.51002115300000E-01 0.37930748000000E-01 0.99317644000000E-01
 0.10829076410000E+00 -.10013891000000E-02 0.31332201000000E-02
 0.32340395700000E-01 -.20280737200000E-01 -.92751282600000E-01
 -.71534301000000E-02 -.18327921300000E-01 -.62723802900000E-01
 0.29564942030000E+00 -.72053721600000E-01 -.55019328100000E-01
 -.32522044400000E-01 0.11629783760000E+00 -.33205104500000E-01
 vibration   26
 -.42346834500000E-01 0.20472469800000E-01 -.19609991290000E+00
 -.13737975800000E-01 -.32563248000000E-01 0.29450592740000E+00
 -.33113395000000E-02 -.59491920400000E-01 -.17614800960000E+00
 0.38955475900000E-01 -.25257185200000E-01 -.23790121700000E-01
 0.39241703400000E-01 0.28796411600000E-01 0.11831163970000E+00
 -.21353758900000E-01 0.10573797600000E-01 0.38491048700000E-01
 -.41852445100000E-01 0.14553853500000E-01 0.11400992400000E-01
 -.28958359600000E-01 0.22670884900000E-01 -.32031798600000E-01
 -.97728522000000E-02 -.27385116400000E-01 0.50929568800000E-01
 0.24448658300000E-01 -.55675569000000E-02 -.12127752400000E-01
 -.43746028700000E-01 0.44162531000000E-02 -.80975542000000E-02
 0.16882371500000E-01 0.57499087200000E-01 0.14407777200000E-01
 0.85703247900000E-01 -.41448638700000E-01 0.16950300700000E-01
 -.84331661100000E-01 0.64274381000000E-01 -.10013571360000E+00
 0.20763923600000E-01 -.13401947500000E-01 -.31049543100000E+00
 0.64006267600000E-01 -.17254804000000E-02 -.21616661900000E-01
 0.95947436300000E-01 0.39813585000000E-02 0.28860733250000E+00
 0.54668384060000E+00 -.80396527600000E-01 0.16852558290000E+00
 -.43027898430000E+00 0.87263646500000E-01 0.18869594380000E+00
 -.31308174800000E-01 0.42288878800000E-01 0.10756376870000E+00
 vibration   27
 0.43397694200000E-01 -.14348063200000E-01 -.38244601200000E-01
 0.21172902200000E-01 0.17074880100000E-01 0.22669678500000E-01
 -.38376076000000E-02 0.38364796400000E-01 0.88789496100000E-01
 -.15803324900000E-01 0.27791464700000E-01 -.35421098500000E-01
 -.35786373000000E-02 -.17283502600000E-01 0.12644846150000E+00
 0.54976240000000E-02 -.28289374000000E-01 -.82814051000000E-02
 0.17328693500000E-01 -.38757916600000E-01 -.27299747500000E-01
 0.27491905000000E-02 -.83298750000000E-02 0.13012280350000E+00
 -.11556472800000E-01 0.51780016300000E-01 -.31639431780000E+00
 -.67556649000000E-02 -.59672319000000E-02 0.12935370630000E+00
 -.96881427000000E-02 -.24872970600000E-01 -.15947358090000E+00
 -.14436449150000E+00 0.36061672800000E-01 -.33719921160000E+00
 -.61744542300000E-01 0.18904643720000E+00 -.34907196880000E+00
 0.59355671900000E-01 -.36555582000000E-01 -.69605814060000E+00
 -.13383251400000E-01 0.48387470000000E-03 -.32408534900000E-01
 -.33680036800000E-01 0.21871559000000E-02 -.37453424000000E-02
 -.28777860000000E-01 0.36793229000000E-02 0.26089822400000E-01
 0.17284616200000E-01 0.34683104000000E-02 0.22251105200000E-01
 -.89399057700000E-01 0.12171935300000E-01 0.20616374800000E-01
 0.12667241200000E-01 -.24738929500000E-01 0.16142673000000E-01
 vibration   28
 0.27637220300000E-01 0.15806612990000E+00 0.22350298600000E-01
 0.95547923800000E-01 -.30476584700000E-01 -.24810685200000E-01
 -.29634753600000E-01 0.59357301200000E-01 0.26283083600000E-01
 -.67224680700000E-01 0.49387478800000E-01 0.26145444700000E-01
 -.91033037800000E-01 0.18788887760000E+00 -.22927964600000E-01
 -.47600101900000E-01 0.10963323660000E+00 -.14203922400000E-01
 0.44227293100000E-01 -.20202483200000E-01 0.16374241000000E-02
 -.50136910300000E-01 -.15674437570000E+00 0.11959397600000E-01
 -.46147605300000E-01 -.58150775900000E-01 -.50241121700000E-01
 0.13918285300000E-01 -.43947698000000E-01 0.22063609800000E-01
 0.44077710600000E-01 0.34084064100000E-01 0.64513009900000E-01
 -.13312345100000E-01 -.12249861300000E-01 -.47286358800000E-01
 0.42757329200000E-01 -.33828684800000E-01 -.44219752900000E-01
 -.78887753000000E-02 0.19533513150000E+00 0.34086820900000E-01
 0.75796897400000E-01 -.23967054660000E+00 0.13577114700000E-01
 0.26426621820000E+00 -.27236518100000E-01 -.27430128000000E-02
 0.73939562210000E+00 0.81975309400000E-01 -.27619246900000E-01
 0.50602713600000E-01 0.17506993210000E+00 0.50030341000000E-02
 0.98654160000000E-01 0.16506681610000E+00 -.22842198300000E-01
 -.19257925330000E+00 -.37339115100000E-01 -.92453470000000E-03
 vibration   29
 0.37507272300000E-01 0.10531200000000E-04 0.15655830110000E+00
 0.13496855600000E-01 0.42336848000000E-02 0.69139493100000E-01
 -.53067506000000E-02 0.30764150000000E-02 -.50340470360000E+00
 0.22076199500000E-01 0.12485637600000E-01 0.53300328870000E+00
 0.46487303200000E-01 -.43061201000000E-02 -.28693386550000E+00
 -.39249675400000E-01 0.23096798800000E-01 0.13417659870000E+00
 -.11955405900000E-01 -.30520504800000E-01 -.13444948600000E-01
 -.33136708800000E-01 -.12652300900000E-01 0.88980396800000E-01
 -.14097492300000E-01 0.19163315000000E-02 -.27960065470000E+00
 0.21155649400000E-01 -.18828011600000E-01 0.92105622800000E-01
 -.52615518300000E-01 -.38837237100000E-01 -.25011058070000E+00
 -.53542824600000E-01 -.12910176000000E-02 -.17391420270000E+00
 0.46724462300000E-01 0.10879652300000E-01 -.42095488100000E-01
 0.39107198700000E-01 0.18688808000000E-02 0.32374224210000E+00
 -.11483152300000E-01 0.28992538600000E-01 0.20535327400000E-01
 -.45872934800000E-01 0.63550412000000E-02 0.81792409000000E-02
 -.99780577100000E-01 -.56676219000000E-02 -.55369862000000E-02
 -.47248467700000E-01 -.26928052800000E-01 -.13710330900000E-01
 0.64262540000000E-03 -.12178631900000E-01 -.77125689000000E-02
 0.24710127400000E-01 -.48046596000000E-02 -.15973068500000E-01
 vibration   30
 0.30430003120000E+00 0.10135931050000E+00 -.17541842000000E-01
 0.17597896280000E+00 0.61049058700000E-01 -.26652212000000E-02
 -.62173876000000E-01 0.54105309200000E-01 0.39632716400000E-01
 0.38812149800000E-01 0.64347590900000E-01 -.49448515300000E-01
 0.16424267360000E+00 0.88661513100000E-01 0.21518016700000E-01
 -.24209870880000E+00 0.90218980700000E-01 0.26104933000000E-02
 -.20395112780000E+00 -.14354277910000E+00 0.67208105000000E-02
 -.11639693860000E+00 -.61203717100000E-01 -.13049135000000E-01
 -.41929234700000E-01 -.12002449310000E+00 0.54590553900000E-01
 0.92810631100000E-01 -.10933284720000E+00 -.37080694600000E-01
 -.23469354120000E+00 -.21591077870000E+00 -.20685680170000E+00
 0.85384027400000E-01 0.89393223000000E-02 0.44608852400000E-01
 0.27187472320000E+00 -.26696473740000E+00 0.18264381620000E+00
 0.35325195400000E+00 0.67244294100000E-01 -.41959162200000E-01
 -.27374505300000E-01 0.44134188200000E-01 -.38041707000000E-02
 -.18676589000000E+00 0.19934112900000E-01 0.21931612000000E-02
 -.23942047330000E+00 0.11278730400000E-01 0.71112503000000E-02
 -.15952042230000E+00 0.23042141000000E-02 0.39145043000000E-02
 -.17327426010000E+00 0.21475816000000E-02 0.70060514000000E-02
 0.75261597900000E-01 -.51369101300000E-01 0.10381692000000E-02
 vibration   31
 0.12545762820000E+00 0.84073052500000E-01 -.92969587000000E-02
 0.89337444800000E-01 0.13500453280000E+00 0.14562761100000E-01
 0.27720561900000E-01 0.89483779700000E-01 -.53038719500000E-01
 -.14224932530000E+00 0.47743019500000E-01 0.19423934400000E-01
 -.32273816690000E+00 0.42773047600000E-01 0.60246515000000E-02
 0.19231588420000E+00 -.36297559560000E+00 0.38865031700000E-01
 -.20815377100000E+00 0.28716999700000E-01 -.63950852200000E-01
 -.82691313000000E-02 0.33069878920000E+00 0.37266130400000E-01
 0.54174156900000E-01 -.59001704900000E-01 0.29705826200000E-01
 0.13057532000000E+00 -.14874922220000E+00 -.37273910100000E-01
 -.22546953880000E+00 0.79547823300000E-01 -.50115927300000E-01
 0.14340057370000E+00 -.93819966900000E-01 0.51183907800000E-01
 0.21686576070000E+00 -.24690765810000E+00 0.13146827140000E+00
 0.34929727390000E+00 -.13746375710000E+00 -.33464763900000E-01
 0.35956343000000E-02 -.68255601100000E-01 -.30549147000000E-02
 0.14489949000000E-01 -.26961678800000E-01 -.94387530000000E-03
 0.20648160890000E+00 0.19091468800000E-01 0.81160761000000E-02
 -.62913308900000E-01 0.74320934300000E-01 0.16721324500000E-01
 -.74737568400000E-01 0.81409673900000E-01 -.14546788200000E-01
 -.12125414100000E-01 -.54973134400000E-01 0.19947187000000E-02
 vibration   32
 -.40999555500000E-01 -.10485295140000E+00 -.20057390000000E-02
 -.11349969770000E+00 0.10966279940000E+00 0.31687422000000E-02
 -.13357984530000E+00 0.21121304270000E+00 -.96743670000000E-02
 0.16847809600000E-01 0.13618637490000E+00 -.31067998000000E-02
 0.19795552270000E+00 -.97596468800000E-01 -.57556020000000E-03
 -.78238628000000E-02 -.11936290380000E+00 -.81111904000000E-02
 -.16310059300000E+00 0.26154831320000E+00 0.22185411000000E-02
 -.31752819600000E-01 -.19285103900000E+00 0.78047717000000E-02
 0.12631907190000E+00 0.80950636400000E-01 0.15167522100000E-01
 0.12303746480000E+00 -.93449237700000E-01 0.31583240000000E-03
 -.20975000830000E+00 0.40171977750000E+00 -.51681217100000E-01
 0.24017960850000E+00 -.45486999600000E+00 0.80432702900000E-01
 -.21447271320000E+00 0.81026781400000E-01 -.11124031190000E+00
 -.16063823330000E+00 0.11664722200000E-01 -.87483750000000E-03
 -.29352829400000E-01 -.33282290400000E-01 0.94538260000000E-03
 0.70498924200000E-01 -.43064126400000E-01 -.22645380000000E-03
 0.22471744110000E+00 -.81171218000000E-02 -.46486008000000E-02
 0.36812084000000E-02 0.50037212100000E-01 0.18500620700000E-01
 0.11718319400000E-01 0.50061148100000E-01 -.21275499700000E-01
 -.25278794000000E-01 -.45604069100000E-01 0.95021740000000E-03
 vibration   33
 -.48484542200000E-01 0.75882403000000E-02 0.78753330000000E-03
 0.78628106800000E-01 -.61351240600000E-01 -.91062190000000E-03
 -.33632435700000E-01 -.83551792600000E-01 -.34695678000000E-02
 -.27760441000000E-02 -.19069811400000E-01 0.92061680000000E-03
 -.50612766200000E-01 0.54211765300000E-01 -.69118940000000E-03
 -.20430922700000E-01 -.23737003900000E-01 -.29697666000000E-02
 -.28110025600000E-01 0.95483726000000E-01 0.45707347000000E-02
 0.26113911400000E-01 -.54820155900000E-01 0.14252583000000E-02
 0.45269181000000E-01 0.22572336000000E-01 -.25479899000000E-02
 0.32602187000000E-02 0.21934525300000E-01 0.90922393000000E-02
 -.28516889100000E-01 0.80163514600000E-01 -.16028689100000E-01
 0.31997211600000E-01 -.98100529400000E-01 0.22107046000000E-02
 -.14322148850000E+00 0.11131430100000E+00 -.71776249700000E-01
 -.83246550300000E-01 0.40312328500000E-01 0.70237224000000E-02
 0.15296596880000E+00 -.64293001400000E-01 -.19016750000000E-03
 -.18295700690000E+00 -.11485456080000E+00 0.28459837000000E-02
 0.37875270010000E+00 0.33536050700000E-01 -.67489363000000E-02
 -.49261262410000E+00 0.27603385350000E+00 0.72719508800000E-01
 -.49458504970000E+00 0.27454273110000E+00 -.55305888700000E-01
 0.93389777500000E-01 0.12780559060000E+00 -.31172370000000E-02
 vibration   34
 -.11130921720000E+00 -.36151985000000E-02 0.22283844000000E-02
 -.22929552100000E-01 0.96820151000000E-01 -.25975943000000E-02
 -.17847332600000E-01 0.16044526280000E+00 0.50893155000000E-02
 0.29833160700000E-01 0.21370000100000E-01 0.30445760000000E-03
 0.11900743470000E+00 -.83241742500000E-01 -.44356160000000E-03
 0.11790752000000E-02 -.19637316200000E-01 0.62440825000000E-02
 0.10744077200000E+00 -.10832425490000E+00 -.17725002300000E-01
 -.35960827400000E-01 0.10840327180000E+00 -.11495544000000E-02
 -.94076769100000E-01 -.62970247300000E-01 0.13664377000000E-02
 -.26335251200000E-01 -.44830556300000E-01 -.68940321000000E-02
 0.14083403990000E+00 -.12542835520000E+00 0.12534600090000E+00
 -.13444914050000E+00 0.31335849370000E+00 -.73427000600000E-01
 0.34650743060000E+00 -.24122807140000E+00 0.11255816810000E+00
 -.27516746770000E+00 0.15313711120000E+00 -.28653600000000E-04
 0.16533420800000E-01 -.19312558300000E-01 0.60469770000000E-03
 -.13908625300000E-01 -.10623679830000E+00 0.10525414000000E-02
 0.46774789480000E+00 0.14658056600000E-01 -.10598361500000E-01
 -.22999696390000E+00 0.18979825940000E+00 0.60217174700000E-01
 -.22459977520000E+00 0.18877779240000E+00 -.53591189800000E-01
 0.26229572600000E-01 0.76544545000000E-02 -.55780300000000E-03
 vibration   35
 -.25017616960000E+00 -.11662348720000E+00 0.64415460000000E-03
 0.11676536780000E+00 0.35198324000000E-01 -.22793271000000E-02
 0.22085016930000E+00 0.67510985300000E-01 0.42296733000000E-02
 -.61529547300000E-01 0.20147548500000E-01 -.47365726000000E-02
 -.43247528000000E-02 0.25066744300000E-01 0.34842946000000E-02
 0.14497692170000E+00 0.19988977210000E+00 0.85911185000000E-02
 -.24058796800000E+00 -.26272212570000E+00 0.15061984000000E-01
 -.19761288800000E-01 -.12697458700000E-01 -.22014113000000E-02
 0.48009028500000E-01 0.71084923000000E-01 0.28523411000000E-02
 0.77015292500000E-01 -.36156854000000E-02 -.97844291000000E-02
 -.35048153830000E+00 -.10455860720000E+00 -.29583005530000E+00
 0.21124538070000E+00 -.40167108790000E+00 0.11855839930000E+00
 -.26087838520000E+00 0.14638088450000E+00 -.45085300300000E-01
 -.26637176010000E+00 -.12511215840000E+00 0.15054686900000E-01
 -.94801331000000E-02 0.25759007500000E-01 0.84556584000000E-02
 -.15126840000000E-01 -.14499675500000E-01 -.78600896000000E-02
 0.13575355600000E+00 0.23040699900000E-01 0.14463536100000E-01
 -.91863650000000E-02 0.29862783500000E-01 0.17970680800000E-01
 -.72642975600000E-01 0.29100522600000E-01 0.10392533000000E-02
 -.56335534000000E-02 -.30926215800000E-01 -.11305585000000E-02
 vibration   36
 0.41528014000000E-02 0.18994160000000E-02 -.40579070000000E-03
 -.27680298000000E-02 0.62912980000000E-03 -.24616041900000E-01
 -.39563197000000E-02 -.10581897000000E-02 -.22083410000000E-02
 0.15861818000000E-02 -.10971196000000E-02 0.14121658000000E-02
 0.47695200000000E-03 -.78456630000000E-03 0.41374100000000E-03
 -.25540729000000E-02 -.30752091000000E-02 0.83405950000000E-03
 0.36367678000000E-02 0.45898163000000E-02 -.89165480000000E-03
 0.68893400000000E-03 -.97600300000000E-04 0.28658720000000E-03
 -.50227000000000E-03 -.13136385000000E-02 0.23819800000000E-04
 -.16665816000000E-02 0.24952470000000E-03 0.92369800000000E-04
 0.50108897000000E-02 0.54450460000000E-03 0.63034370000000E-03
 -.38469173000000E-02 0.80366864000000E-02 -.75081200000000E-03
 0.49289060000000E-02 -.21221819000000E-02 -.41260510000000E-03
 0.59214910000000E-02 0.58720100000000E-03 0.49868589000000E-02
 0.19031852000000E-02 0.17230406000000E-02 0.17636670880000E+00
 -.90463450000000E-03 -.10188733000000E-02 -.16239494490000E+00
 0.83286403000000E-02 -.65399830000000E-03 0.36779982640000E+00
 0.61481585830000E+00 0.10830705500000E-01 0.15492385610000E+00
 -.61023515660000E+00 -.82062003000000E-02 0.17489340560000E+00
 -.91370100000000E-03 -.66882540000000E-03 -.33039903500000E-01
 vibration   37
 -.25934300800000E-01 -.57165914000000E-02 -.93216500000000E-04
 0.85985933100000E-01 -.16695152840000E+00 0.95000000000000E-07
 -.26064654300000E-01 0.63346454300000E-01 0.20949193000000E-02
 -.11079308860000E+00 0.13699667130000E+00 0.15073462000000E-02
 0.41654012000000E-01 -.17201671400000E-01 -.15822780000000E-03
 0.49423199100000E-01 -.44062185400000E-01 -.41844367000000E-02
 0.50327545700000E-01 -.70752147000000E-02 0.30576293000000E-02
 -.37297981900000E-01 0.24447795200000E-01 -.18222369000000E-02
 -.28688514700000E-01 0.13223143300000E-01 0.23982130000000E-02
 0.24508563600000E-01 -.51177448900000E-01 -.64267988000000E-02
 0.27673847100000E-01 0.13575801440000E+00 0.24722055800000E-01
 0.22817051700000E-01 -.20907074700000E-01 0.10530497800000E-01
 0.91985243000000E-01 -.95556622900000E-01 0.33610799000000E-01
 -.51822583210000E+00 0.48332679720000E+00 0.59897040000000E-03
 0.10181471490000E+00 -.68161083400000E-01 -.25973060000000E-03
 -.63355609300000E-01 0.11009030390000E+00 -.99949550000000E-03
 -.52436329470000E+00 -.28708730000000E-02 0.15086693600000E-01
 0.65408650700000E-01 -.14992553780000E+00 -.75360750700000E-01
 0.54883508400000E-01 -.15039862510000E+00 0.75625487400000E-01
 -.17589714400000E-01 0.28424367600000E-01 -.10480280000000E-03
 vibration   38
 0.12404228380000E+00 0.12269007500000E+00 0.16458130000000E-03
 -.12196798120000E+00 -.56948640900000E-01 0.51390680000000E-03
 0.17578730100000E-01 -.14101618800000E-01 0.66245048000000E-02
 0.40895870100000E-01 -.23072143300000E-01 -.22385023000000E-02
 -.52866476800000E-01 -.12658963060000E+00 -.99261070000000E-03
 0.13478358000000E-02 0.40249453200000E-01 0.54504760000000E-02
 0.65201187000000E-01 -.10046478610000E+00 -.19311380100000E-01
 -.15218481770000E+00 0.51962410700000E-01 0.36025890000000E-03
 -.22523172300000E-01 0.52936353900000E-01 -.13751491000000E-02
 0.11650512280000E+00 0.13272762200000E-01 -.45424286000000E-02
 0.35743410500000E-01 0.15327514780000E+00 0.13391490580000E+00
 0.29617320540000E+00 -.55324072110000E+00 0.12201247790000E+00
 -.38240971380000E+00 0.23112103090000E+00 -.61877403000000E-01
 -.11974875780000E+00 0.38531171950000E+00 -.76474358000000E-02
 -.20347985000000E-01 0.23644461300000E-01 0.12229779000000E-02
 0.14288292900000E-01 -.47812397000000E-01 0.97030000000000E-06
 0.17023463530000E+00 -.76573762000000E-02 -.53500560000000E-02
 -.46466175000000E-01 0.74562264100000E-01 0.37913591400000E-01
 -.48384144600000E-01 0.75244092100000E-01 -.35635186800000E-01
 0.24580769900000E-01 0.35364215700000E-01 -.10463849000000E-02
 vibration   39
 0.12470613740000E+00 -.16171972510000E+00 -.35710107000000E-02
 -.24442523050000E+00 -.14180298050000E+00 0.52893313000000E-02
 0.49868415000000E-02 -.35235016400000E-01 0.16328976000000E-02
 -.10418621590000E+00 0.20035073330000E+00 -.42139390000000E-03
 0.43816757900000E-01 0.15540944660000E+00 0.12094433000000E-02
 0.11803581930000E+00 0.62544278600000E-01 -.30761685000000E-02
 0.30111628200000E-01 -.86413169000000E-01 0.14855078200000E-01
 -.25221788900000E-01 0.27300631000000E-02 -.84815782000000E-02
 -.37870405200000E-01 0.60412815300000E-01 0.70680402000000E-02
 0.31483617000000E-02 -.80476947700000E-01 -.10530072700000E-01
 -.54770350500000E-01 0.25984506670000E+00 -.60413239300000E-01
 -.48659007200000E-01 0.11653496100000E+00 -.18391846400000E-01
 0.29801594750000E+00 -.23208623610000E+00 0.74081753700000E-01
 0.44511509170000E+00 -.48509752220000E+00 -.27466329000000E-02
 0.16753013700000E-01 0.25711041900000E-01 0.51883380000000E-03
 -.93793481000000E-02 -.60010269400000E-01 0.22005780000000E-03
 0.22135068470000E+00 -.87155900000000E-03 -.35782190000000E-02
 -.74367148900000E-01 0.89746313900000E-01 0.47250220100000E-01
 -.76875290600000E-01 0.89658088100000E-01 -.44129670300000E-01
 0.28034752400000E-01 0.54339436900000E-01 -.10946985000000E-02
 vibration   40
 -.12499620120000E+00 -.47641717300000E-01 0.26291538000000E-02
 0.42220136100000E-01 0.22919683500000E-01 -.24129139000000E-02
 -.59297695200000E-01 0.44365222300000E-01 0.40364363000000E-02
 0.13843621320000E+00 -.14179620700000E-01 -.17496868000000E-02
 0.17201819000000E-02 0.71917508700000E-01 -.12294600000000E-02
 -.52236597900000E-01 -.40341036800000E-01 -.77355610000000E-03
 0.11034631760000E+00 -.36311373700000E-01 -.26573651000000E-02
 -.11449387750000E+00 0.52625808500000E-01 -.38860299000000E-02
 -.62066803600000E-01 0.35688647700000E-01 0.17868030000000E-03
 0.71736824000000E-01 -.48038234000000E-02 -.31618006000000E-02
 0.92521810100000E-01 0.16710606990000E+00 0.97038129000000E-01
 0.16156553400000E+00 -.29673382580000E+00 0.53708131200000E-01
 -.12880222510000E+00 0.80449601500000E-01 -.26773223600000E-01
 0.43637692590000E+00 -.63396485670000E+00 -.51957130000000E-03
 0.88716039200000E-01 -.84247167700000E-01 -.18311870000000E-03
 -.21309578500000E-01 0.55750331500000E-01 -.13722540000000E-03
 -.29968432870000E+00 -.13176060300000E-01 0.51312963000000E-02
 -.17414021400000E-01 -.69444466100000E-01 -.59683108700000E-01
 -.18956533000000E-01 -.69478030800000E-01 0.61040554700000E-01
 -.21940485800000E-01 -.19884246000000E-02 0.26035420000000E-03
 vibration   41
 -.10384113960000E+00 -.96178561000000E-02 0.17621663000000E-02
 0.21424331020000E+00 -.34664780600000E-01 -.19141806000000E-02
 0.19484024200000E-01 -.21278152100000E+00 0.17002788000000E-02
 -.18570791720000E+00 0.17746431580000E+00 0.14348242000000E-02
 0.10105918200000E+00 0.35890648600000E-01 -.17817793000000E-02
 -.53856526600000E-01 -.10030770740000E+00 -.14954398600000E-01
 0.14801876670000E+00 0.93992354400000E-01 0.20322438900000E-01
 -.94025395600000E-01 0.34337238700000E-01 -.65951271000000E-02
 -.78460453400000E-01 -.11559770200000E-01 -.19559464000000E-02
 0.65611891300000E-01 -.92982762000000E-02 -.45159370000000E-03
 0.24485858090000E+00 -.22225967590000E+00 0.59141388500000E-01
 0.16035332540000E+00 -.31461840510000E+00 0.59336976600000E-01
 -.18825027310000E+00 0.10178758950000E+00 -.39573348200000E-01
 0.53088950300000E-01 -.17472892080000E+00 -.16795793000000E-02
 -.20467874640000E+00 0.22119228870000E+00 0.12022931000000E-02
 0.30659688300000E-01 -.66438189000000E-01 -.46394250000000E-03
 0.50004369100000E+00 0.47727104700000E-01 -.84206967000000E-02
 0.13540438930000E+00 0.87791970600000E-01 0.11803129460000E+00
 0.13241345100000E+00 0.87835829100000E-01 -.12255724980000E+00
 0.11768268900000E-01 -.55159698500000E-01 0.42796740000000E-03
 vibration   42
 0.61138918800000E-01 -.82862301100000E-01 -.25142835000000E-02
 -.71429965600000E-01 0.24743463800000E-01 0.19006521000000E-02
 0.38118719000000E-02 0.59698897600000E-01 -.30691454000000E-02
 -.92766572500000E-01 -.74490589600000E-01 0.20511223000000E-02
 0.69466974100000E-01 0.98391396200000E-01 0.68007000000000E-05
 0.42641326700000E-01 -.11089261300000E-01 -.60326045000000E-02
 -.17007063000000E-02 0.56483653800000E-01 0.81410139000000E-02
 -.79381200000000E-04 0.37895036700000E-01 0.49090709000000E-02
 -.67062582200000E-01 -.11815872490000E+00 -.40737061000000E-02
 0.31043446400000E-01 0.63659978200000E-01 0.15234501000000E-02
 0.17962178900000E+00 -.78991429850000E+00 -.45098874900000E-01
 0.11769938180000E+00 -.23791319480000E+00 0.61569865300000E-01
 -.32692019720000E+00 0.23165527330000E+00 -.59364001000000E-01
 -.83898584700000E-01 0.64595386800000E-01 0.45519438000000E-02
 0.45350428600000E-01 -.45763539600000E-01 -.35101900000000E-03
 -.74488323000000E-02 0.83202593000000E-02 -.42019800000000E-04
 -.74177633300000E-01 -.81525348000000E-02 0.34044331000000E-02
 -.33038256300000E-01 -.12848100000000E-01 -.21896307800000E-01
 -.31775296100000E-01 -.14166928100000E-01 0.22991943800000E-01
 -.27618869000000E-02 0.90301999000000E-02 0.54345000000000E-05
 vibration   43
 -.38027153600000E-01 0.76099436500000E-01 0.13041570000000E-02
 -.29648021100000E-01 -.30045460000000E-03 0.13198790000000E-03
 0.69606339800000E-01 -.41799089100000E-01 0.15969120000000E-02
 0.58870698300000E-01 0.11352988400000E+00 -.26044105000000E-02
 -.49215067300000E-01 -.95896763300000E-01 0.24634220000000E-03
 0.15911472100000E-01 0.25607422300000E-01 -.42712850000000E-02
 -.29324199300000E-01 0.70834023000000E-01 -.79709593000000E-02
 -.52348133600000E-01 -.51707724300000E-01 0.71656569000000E-02
 -.33156627000000E-02 0.10828559310000E+00 0.50461403000000E-02
 0.97585998000000E-02 -.66393416000000E-01 -.23275865000000E-02
 0.17987473940000E+00 -.86747225530000E+00 0.29275868300000E-01
 -.21500544100000E-01 0.46412567000000E-01 -.33281928100000E-01
 0.22001378250000E+00 -.16643970420000E+00 0.27431217400000E-01
 0.16069636750000E+00 -.12240605190000E+00 -.35750566000000E-02
 0.35073892100000E-01 -.38500158100000E-01 -.57938900000000E-04
 0.17905030000000E-02 0.11479053500000E-01 -.12792100000000E-04
 -.96596982200000E-01 -.12143107200000E-01 0.67534620000000E-03
 -.52782805300000E-01 -.17124808700000E-01 -.37687421300000E-01
 -.52771173600000E-01 -.16044199600000E-01 0.39325432700000E-01
 0.94744300000000E-04 0.12805033600000E-01 -.19758610000000E-03
 vibration   44
 -.46863473200000E-01 0.17390730500000E+00 0.92095300000000E-04
 -.78310052400000E-01 0.21304951260000E+00 -.11063484000000E-02
 0.61547232000000E-01 -.21668550980000E+00 -.53486260000000E-03
 -.23710486650000E+00 0.10694996490000E+00 0.48128360000000E-03
 0.14708781970000E+00 -.12696071310000E+00 0.45431750000000E-03
 0.11260792200000E-01 0.29977263600000E-01 0.52594568000000E-02
 0.10757985200000E-01 -.47430331300000E-01 0.95351210000000E-03
 0.26676009600000E-01 0.13575437400000E-01 -.46434273000000E-02
 0.33114574200000E-01 -.12553746340000E+00 -.63123713000000E-02
 -.14208267900000E-01 0.37935555500000E-01 0.78469318000000E-02
 -.89081735700000E-01 0.40744198730000E+00 -.28981758000000E-02
 -.69853904000000E-02 0.63273551000000E-02 0.30338230000000E-02
 -.20119137930000E+00 0.13021039390000E+00 -.38402137500000E-01
 0.35405695990000E+00 -.19955704520000E+00 -.96548755000000E-02
 0.12308013480000E+00 -.14746098650000E+00 -.77829090000000E-03
 0.26404371200000E-01 0.35543752900000E-01 -.46159400000000E-03
 -.34960346130000E+00 -.55558979000000E-01 0.67414621000000E-02
 -.24141985390000E+00 -.52086580000000E-01 -.16222366780000E+00
 -.23551814960000E+00 -.52727518700000E-01 0.16963857210000E+00
 -.10671498600000E-01 0.73941605000000E-02 0.21404720000000E-03
 vibration   45
 0.24545411500000E-01 -.65314127500000E-01 -.72684900000000E-04
 0.21215653300000E-01 0.16847024100000E-01 -.10856600000000E-03
 0.59077297000000E-02 -.24930541000000E-01 0.37000600000000E-04
 0.11258680900000E-01 -.68179656000000E-02 -.20617000000000E-03
 -.20682738800000E-01 0.35104942300000E-01 -.14260920000000E-03
 -.15480193500000E-01 -.45527450000000E-02 -.10036381000000E-02
 0.14161811200000E-01 0.19687140000000E-02 0.17862144000000E-02
 -.12393898000000E-01 -.34116740000000E-03 -.12655862000000E-02
 -.49934661000000E-02 0.36797123700000E-01 0.16398151000000E-02
 0.46910174000000E-02 -.12408072000000E-01 -.90496320000000E-03
 0.13739580900000E-01 0.16202120300000E-01 0.71364909000000E-02
 0.42963093000000E-02 -.13327109100000E-01 -.57267410000000E-02
 0.55784184300000E-01 -.35224906300000E-01 0.34269100000000E-02
 -.16014184000000E+00 0.11406029380000E+00 0.32722377000000E-02
 -.44095346400000E-01 0.46182488700000E-01 0.33245000000000E-03
 0.15670799950000E+00 -.25190940400000E-01 -.20013956000000E-02
 -.44921703300000E+00 -.16217856380000E+00 0.23567259000000E-02
 -.52498038360000E+00 0.15654824970000E+00 -.20879489340000E+00
 -.51794015950000E+00 0.16131892730000E+00 0.22423929470000E+00
 -.34653259000000E-02 -.17284651400000E-01 0.22887410000000E-03
 vibration   46
 -.86146899100000E-01 0.21778886360000E+00 -.14972660000000E-03
 0.15044015800000E-01 -.26253238580000E+00 0.13823296000000E-02
 -.40510369800000E-01 0.19566131280000E+00 -.26474080000000E-03
 -.29481929300000E-01 -.20760176300000E-01 0.18991077000000E-02
 0.62436565500000E-01 -.72092669300000E-01 0.21222500000000E-04
 0.55560431600000E-01 -.80136434000000E-02 0.15332199000000E-02
 -.65638098000000E-01 0.10335684500000E-01 -.50861127000000E-02
 0.56703105100000E-01 0.28751099000000E-02 0.56684867000000E-02
 0.23792443700000E-01 -.13099463100000E+00 -.56816251000000E-02
 -.21006293600000E-01 0.48358445300000E-01 0.95505490000000E-03
 -.60568549900000E-01 -.77985681600000E-01 -.35568939000000E-01
 -.24579858700000E-01 0.76546438000000E-01 0.30815811400000E-01
 -.20280858300000E+00 0.12516870450000E+00 0.40623840000000E-02
 0.57502811540000E+00 -.42990665660000E+00 -.11644205700000E-01
 -.52808281000000E-01 0.96914748300000E-01 -.57057760000000E-03
 0.75451324400000E-01 -.27350651300000E-01 -.15709120000000E-02
 -.14681359810000E+00 -.74391541100000E-01 0.83445677000000E-02
 -.24899079780000E+00 0.11890517630000E+00 -.68704351800000E-01
 -.24073195000000E+00 0.11336022960000E+00 0.76722180600000E-01
 0.59281690000000E-02 0.80102464000000E-02 -.46599300000000E-04
 vibration   47
 0.32683256000000E-02 -.72862299000000E-02 0.13231000000000E-05
 -.17192493000000E-02 -.98853135000000E-02 0.39526600000000E-04
 0.12076285400000E-01 0.10849896300000E-01 0.23732680000000E-03
 0.93065162000000E-02 0.71476748000000E-02 -.25679440000000E-03
 -.64766849000000E-02 0.33028854000000E-02 0.17350100000000E-04
 -.92169980000000E-02 -.71960970000000E-02 -.25305140000000E-03
 0.20060487000000E-02 0.18851670000000E-02 0.48669790000000E-03
 -.37354164000000E-02 -.40731050000000E-03 -.53686530000000E-03
 0.36802733000000E-02 -.91331896000000E-02 -.25827550000000E-03
 -.16908928000000E-02 0.37572050000000E-02 0.53384570000000E-03
 -.13015520000000E-03 0.14139678300000E-01 0.31226402000000E-02
 -.12677973000000E-02 0.13961315000000E-02 -.30818080000000E-03
 -.10632275900000E-01 0.80472635000000E-02 -.15814681000000E-02
 -.59253654000000E-02 0.47516150000000E-03 -.11751500000000E-04
 -.33908850200000E-01 -.10500175000000E-02 0.11890096000000E-02
 -.10988461000000E-02 0.49067552600000E-01 0.76895480000000E-03
 0.41953856750000E+00 0.13473516800000E+00 -.17595935100000E-01
 -.19669692270000E+00 -.48126998970000E+00 -.36745466200000E+00
 -.19308500900000E+00 -.46835176980000E+00 0.37113646260000E+00
 0.22757250000000E-01 0.20304367800000E-01 -.65371030000000E-03
 vibration   48
 0.23262320000000E-03 -.13906259000000E-02 0.66050810000000E-03
 -.40565180000000E-03 0.38633760000000E-03 0.28603977000000E-02
 0.21129236000000E-02 -.24965860000000E-03 -.60666850000000E-03
 0.21207827000000E-02 0.23268200000000E-02 0.28367900000000E-04
 -.13592824000000E-02 -.62121100000000E-04 -.21176440000000E-03
 -.14553996000000E-02 0.43347400000000E-04 0.12096140000000E-03
 0.29649120000000E-03 -.71126800000000E-04 -.17844410000000E-03
 0.87176600000000E-04 -.34069480000000E-03 0.40431580000000E-03
 -.63240590000000E-03 -.13655403000000E-02 -.20660600000000E-04
 -.82715800000000E-04 0.45766610000000E-03 -.64473400000000E-04
 -.37944600000000E-04 0.19381639000000E-02 0.23363000000000E-05
 0.19082150000000E-03 -.85434670000000E-03 0.13610260000000E-03
 -.14999911000000E-02 0.10813720000000E-02 0.22688100000000E-04
 -.27919430000000E-02 0.13239267000000E-02 -.76689130000000E-03
 -.11380257000000E-02 -.15393140000000E-03 -.22833794400000E-01
 -.34632140000000E-03 0.41256060000000E-03 -.51858227300000E-01
 0.16585625600000E-01 0.14269996000000E-02 0.71851049170000E+00
 -.28092018670000E+00 0.39454213760000E+00 0.51049322400000E-01
 0.27368951580000E+00 -.40651475720000E+00 0.53419059000000E-01
 0.50026780000000E-03 0.38935930000000E-03 0.16288592000000E-02
 vibration   49
 0.36280647000000E-02 -.13314461320000E+00 0.65222340000000E-03
 -.28031139900000E-01 -.12759080700000E-01 0.11142653000000E-02
 0.13534221680000E+00 0.21075582300000E-01 -.27513850000000E-03
 0.19837690790000E+00 0.31914419720000E+00 -.48278627000000E-02
 -.12887509310000E+00 -.13950913000000E-02 0.20139663000000E-02
 -.72561806100000E-01 -.21764023500000E-01 0.25171311000000E-02
 0.13749006800000E-01 -.41913883000000E-02 -.78265664000000E-02
 -.16062668530000E+00 0.80571402000000E-02 0.40763530000000E-03
 0.25248562260000E+00 -.35462795680000E+00 -.14553616100000E-01
 -.68956265200000E-01 0.10358114300000E+00 0.95538277000000E-02
 0.21558510700000E-01 -.86123909000000E-02 0.62029767500000E-01
 -.14447690020000E+00 0.40696555150000E+00 0.34788081900000E-01
 -.47604552400000E+00 0.27713312950000E+00 0.89628063000000E-02
 -.19548109980000E+00 0.30093212600000E-01 -.36238599000000E-02
 -.18597083000000E-02 0.13223143000000E-02 0.59593830000000E-03
 0.33083013000000E-02 -.10367318600000E-01 0.10971945000000E-02
 -.72191737900000E-01 -.24427773700000E-01 -.16455508300000E-01
 0.35488275800000E-01 0.79543160700000E-01 0.63490181100000E-01
 0.17244011200000E-01 0.10069912880000E+00 -.67383735700000E-01
 -.10581805000000E-02 0.15095040000000E-03 0.54649000000000E-04
 vibration   50
 -.93959625000000E-02 0.20019847900000E-01 -.66363820000000E-03
 -.70522115600000E-01 -.71907948100000E-01 0.34485024000000E-02
 0.45695857180000E+00 0.18037807800000E+00 -.28641113000000E-02
 -.28521634770000E+00 -.27064105800000E+00 0.21027250000000E-02
 0.91523786800000E-01 0.88267692100000E-01 -.18920596000000E-02
 -.29670949480000E+00 -.14272773170000E+00 -.11685276100000E-01
 0.93143775400000E-01 0.36152793300000E-01 0.11227025900000E-01
 -.22907303220000E+00 0.10050948000000E-01 -.10512449000000E-01
 0.34237378620000E+00 0.18854276810000E+00 0.56830577000000E-02
 -.47961380800000E-01 -.28576406000000E-01 0.23655318000000E-02
 0.10936046060000E+00 0.66630609900000E-01 0.11983576020000E+00
 -.13204842660000E+00 0.26896646310000E+00 -.65999031400000E-01
 0.22945367540000E+00 -.14210310640000E+00 0.23191524200000E-01
 0.13543068600000E+00 -.12312324630000E+00 -.54635861000000E-02
 0.63684214000000E-02 -.42577054200000E-01 0.55924850000000E-03
 -.10590079000000E-01 0.31384491000000E-02 -.62018260000000E-03
 -.34378305000000E-01 -.11396114000000E-02 0.76352535000000E-02
 0.44095869800000E-01 0.44380837200000E-01 0.56788594600000E-01
 0.43644430500000E-01 0.38054309400000E-01 -.57573912500000E-01
 0.13316661700000E-01 0.30948391500000E-01 -.51990020000000E-03
 vibration   51
 0.14900215000000E-02 0.26957286000000E-02 0.64151420000000E-03
 0.23706459800000E-01 0.17092398100000E-01 -.99386370000000E-03
 -.11926348140000E+00 -.30288077100000E-01 0.26948923000000E-02
 -.25299887400000E-01 -.55579158700000E-01 0.14067390000000E-02
 0.22178789900000E-01 0.11758148700000E-01 -.74477880000000E-03
 0.73183531600000E-01 0.27965970700000E-01 -.17345903000000E-02
 0.14761203400000E-01 -.21661090600000E-01 0.25968138000000E-02
 -.79547801700000E-01 0.54035968000000E-02 -.13237617000000E-02
 0.85470707000000E-01 0.65153932600000E-01 -.14103826800000E-01
 0.44794659900000E-01 -.77555630300000E-01 -.17436406900000E-01
 0.37919276000000E-01 -.11676766370000E+00 0.12212931000000E-02
 -.94029395400000E-01 0.72568736000000E+00 0.19163644040000E+00
 -.55844437680000E+00 0.90265944400000E-01 0.19250401250000E+00
 0.55816123000000E-02 0.16472502000000E-02 0.30719270000000E-02
 -.65617514000000E-02 0.35246071000000E-02 -.38383500000000E-04
 0.10137329000000E-02 0.28036905000000E-02 -.34844290000000E-03
 0.17015212300000E-01 0.52406446000000E-02 0.47373098000000E-02
 -.38427446000000E-02 -.19243177100000E-01 -.14178734400000E-01
 0.28703671000000E-02 -.26922920000000E-01 0.15883778200000E-01
 -.13220240000000E-03 -.31120330000000E-02 -.44910900000000E-04
 vibration   52
 -.13632755000000E-02 -.73931197000000E-02 -.10843480000000E-02
 -.38946453200000E-01 -.19602507100000E-01 0.12902418000000E-02
 0.20482499910000E+00 0.36332149200000E-01 -.35779782000000E-02
 0.35527609100000E-01 0.54703665900000E-01 -.18161600000000E-03
 -.30027372700000E-01 -.92489592000000E-02 0.88999480000000E-03
 -.13187562150000E+00 -.43379767100000E-01 0.23047923000000E-02
 -.15984845700000E-01 0.37626705400000E-01 -.18776671000000E-02
 0.16194630040000E+00 -.15330231700000E-01 0.29678028000000E-02
 -.24453764460000E+00 0.21734772500000E-01 -.12820527300000E-01
 0.10048985260000E+00 -.94542731800000E-01 -.19525344200000E-01
 -.50743987400000E-01 0.19463085430000E+00 -.87700590000000E-03
 0.29826980000000E-01 0.49858858030000E+00 0.24402124750000E+00
 -.65141119520000E+00 0.13382959640000E+00 0.16434517440000E+00
 -.18124245100000E-01 0.48508680000000E-02 -.48197305000000E-02
 0.11531025600000E-01 -.93540833000000E-02 0.19378300000000E-04
 -.22200979000000E-02 -.26506152000000E-02 0.47537860000000E-03
 -.22850222100000E-01 -.60504608000000E-02 -.66083191000000E-02
 0.40572339000000E-02 0.21868556900000E-01 0.16597490400000E-01
 -.56759291000000E-02 0.32898619100000E-01 -.19178491300000E-01
 0.29974970000000E-03 0.55995466000000E-02 0.78790100000000E-04
 vibration   53
 -.23924179900000E-01 -.19976082500000E-01 0.44595330000000E-03
 0.66757979000000E-01 0.19736371000000E-02 -.14166086000000E-02
 -.21038039800000E-01 0.13983073800000E-01 0.40291080000000E-03
 -.32626346000000E-02 0.21354196300000E-01 -.26296000000000E-03
 0.16203483800000E-01 0.10552761400000E-01 -.19499850000000E-03
 0.16068701100000E-01 0.15442820600000E-01 0.35478679000000E-02
 -.14050063000000E-01 -.19040003600000E-01 -.69760420000000E-02
 0.14324036300000E-01 0.48451460000000E-02 0.14186898000000E-02
 -.23244069300000E-01 -.12087484300000E-01 -.20513600000000E-04
 0.59666338000000E-02 -.31795743000000E-02 0.18196497000000E-02
 -.16867502300000E-01 -.14517996000000E-01 0.13508957400000E-01
 0.79345821000000E-02 -.17544246200000E-01 -.10153235500000E-01
 -.35309321000000E-02 0.26724427000000E-02 -.11393528300000E-01
 0.20382486700000E-01 -.83872554400000E-01 0.30435378000000E-02
 -.53824343670000E+00 -.47805661350000E+00 0.13255552300000E-01
 0.92352098200000E-01 0.25485296100000E-01 -.18904823000000E-02
 -.32752271270000E+00 -.95482998300000E-01 0.44316569000000E-02
 0.21843343730000E+00 0.12009007570000E+00 0.11737824360000E+00
 0.21106617380000E+00 0.12208324490000E+00 -.12424167140000E+00
 0.28755994610000E+00 0.32354296810000E+00 -.77816738000000E-02
 vibration   54
 -.27772060000000E-03 0.23686080000000E-03 0.12967600000000E-04
 -.24350270000000E-03 -.20577650000000E-03 0.13050000000000E-05
 0.63895510000000E-03 0.55365040000000E-03 0.18318100000000E-04
 0.67537000000000E-04 -.29887380000000E-03 -.43857000000000E-05
 -.13301320000000E-03 -.17862770000000E-03 0.35201000000000E-05
 -.38831850000000E-03 -.43002010000000E-03 -.83614200000000E-04
 0.15613470000000E-03 -.19593900000000E-04 0.29889230000000E-03
 -.33938720000000E-03 -.74754000000000E-04 -.10386550000000E-03
 0.30758300000000E-03 0.22150900000000E-03 -.17538100000000E-04
 -.10542450000000E-03 0.90057500000000E-04 -.14790900000000E-04
 0.24759025000000E-02 0.98757340000000E-03 -.10989095000000E-02
 0.13340430000000E-03 0.15711020000000E-03 0.17190630000000E-03
 -.18293160000000E-03 -.24212860000000E-03 0.21253980000000E-03
 -.55405290000000E-03 0.10971480000000E-03 -.50212400000000E-04
 0.10110433000000E-02 -.78339240000000E-03 -.25486500000000E-04
 -.49470915700000E-01 -.11291756100000E-01 0.80310410000000E-03
 0.93535814300000E-01 -.42366707050000E+00 -.17046170000000E-02
 0.23107976690000E+00 0.28024822020000E+00 -.52209736090000E+00
 0.24811122400000E+00 0.27989462160000E+00 0.51453191700000E+00
 0.56898650000000E-03 0.58222690000000E-03 -.10143800000000E-04
 vibration   55
 -.92859000000000E-05 0.37283100000000E-04 -.59054400000000E-04
 0.24602800000000E-04 0.26747100000000E-04 -.14383250000000E-03
 -.13232250000000E-03 -.19824200000000E-04 0.20024170000000E-03
 0.13549400000000E-04 -.67655400000000E-04 -.10296030000000E-03
 0.50699000000000E-05 -.10788800000000E-04 0.47743400000000E-04
 0.66773700000000E-04 0.41518400000000E-04 0.58580000000000E-06
 0.13141490000000E-03 -.96769000000000E-05 -.11294100000000E-04
 -.48705200000000E-04 -.17631400000000E-04 0.94619900000000E-04
 0.52821300000000E-04 0.34225400000000E-04 -.33620000000000E-06
 -.11528700000000E-04 -.20830000000000E-06 -.57392600000000E-04
 -.99970340000000E-03 -.30242130000000E-03 -.16172140000000E-03
 -.14016030000000E-03 -.15417200000000E-04 0.22520000000000E-05
 0.48316000000000E-04 0.14344380000000E-03 0.81597400000000E-04
 -.23391360000000E-03 -.24611110000000E-03 -.39779400000000E-04
 -.38956000000000E-05 0.33228800000000E-04 0.94327940000000E-03
 0.15069997000000E-02 0.36838080000000E-03 0.90964628200000E-01
 0.14582304000000E-02 -.41614853000000E-02 0.16574636100000E-01
 0.27256125640000E+00 0.32347911060000E+00 -.56113323300000E+00
 -.29205013830000E+00 -.32394489570000E+00 -.55443125110000E+00
 0.17150800000000E-04 0.10683000000000E-05 0.27779290000000E-03
 vibration   56
 0.28813970000000E-03 -.34321900000000E-04 -.98675000000000E-05
 0.21371000000000E-03 -.31697330000000E-03 0.12779100000000E-04
 -.30754600000000E-04 -.42226840000000E-03 -.25568600000000E-04
 -.16701900000000E-04 0.16739750000000E-03 0.68104000000000E-05
 -.19160900000000E-04 0.49903100000000E-04 0.21478000000000E-05
 0.71503200000000E-04 0.28458820000000E-03 0.33733600000000E-04
 0.10757210000000E-03 0.10120920000000E-03 -.15637520000000E-03
 0.17086200000000E-03 0.83635200000000E-04 0.50179400000000E-04
 -.90891600000000E-04 -.16212800000000E-03 0.11222000000000E-04
 0.26219800000000E-04 -.39939800000000E-04 -.21174800000000E-04
 -.34567214000000E-02 -.85393300000000E-03 0.84578500000000E-03
 -.30881400000000E-03 -.15588230000000E-03 0.25640200000000E-04
 0.29194010000000E-03 0.45661360000000E-03 0.88215900000000E-04
 -.92131250000000E-03 -.58777250000000E-03 0.10009600000000E-04
 0.12789324000000E-02 0.21359761000000E-02 -.28784200000000E-04
 0.85074090000000E-03 0.92994550100000E-01 -.46735920000000E-03
 0.20809507670000E+00 -.87793129410000E+00 -.30750408000000E-02
 -.11354845200000E+00 -.12176176280000E+00 0.25072442150000E+00
 -.11907086560000E+00 -.11839824800000E+00 -.24181456390000E+00
 -.37553940000000E-03 -.69543940000000E-03 0.62505000000000E-05
 vibration   57
 0.28685672000000E-02 0.21281427000000E-02 0.29979800000000E-04
 0.73339600000000E-04 -.33716000000000E-04 -.38167300000000E-04
 -.11036290000000E-02 -.11984771000000E-02 -.65752200000000E-04
 -.99021220000000E-03 -.40962100000000E-04 0.40463500000000E-04
 0.78179880000000E-03 0.79271890000000E-03 -.92943300000000E-04
 -.58453080000000E-03 -.93108210000000E-03 -.59575570000000E-03
 0.83851157400000E-01 0.18567990900000E-01 -.12862927700000E-01
 -.61460840000000E-03 0.81409630000000E-03 -.58113020000000E-03
 -.11652365000000E-02 0.24047180000000E-03 -.40977100000000E-03
 -.18040530000000E-03 0.13376330000000E-03 0.31210970000000E-03
 -.95680675210000E+00 -.21106573490000E+00 0.17346975800000E+00
 0.45116532000000E-02 0.12521477000000E-02 -.97851260000000E-03
 -.17519180000000E-02 -.36919170000000E-02 -.12656930000000E-02
 -.33424794300000E-01 -.33712138000000E-01 0.71437680000000E-03
 0.27253380000000E-03 0.31553330000000E-03 0.11656000000000E-05
 -.16061090000000E-03 -.27569520000000E-03 -.89353500000000E-04
 -.26785870000000E-03 0.21337374000000E-02 0.17684400000000E-04
 0.91494750000000E-03 0.52602750000000E-03 -.17470246000000E-02
 0.17248658000000E-02 0.10805724000000E-02 0.28387063000000E-02
 -.21915640000000E-03 -.15703230000000E-03 -.35091000000000E-05
 vibration   58
 0.62400000700000E-01 0.63051225900000E-01 -.71416620000000E-03
 -.13552011000000E-02 -.90376300000000E-04 0.48956000000000E-04
 -.91415430000000E-03 -.11618325000000E-02 0.23870200000000E-04
 -.24651549000000E-02 -.17254937000000E-02 0.40365100000000E-04
 0.10732924000000E-02 -.19031576000000E-02 -.16014000000000E-05
 0.20422880000000E-03 0.41824320000000E-03 0.18734370000000E-03
 -.47846958000000E-02 -.69045530000000E-03 0.88319200000000E-04
 0.86315530000000E-03 -.29243620000000E-03 0.23377730000000E-03
 -.10791210000000E-03 0.95824600000000E-04 0.18638600000000E-04
 -.75237100000000E-04 -.20107000000000E-04 0.23626800000000E-04
 0.44721674000000E-01 0.98925254000000E-02 -.68338694000000E-02
 0.78916550000000E-03 -.16024200000000E-03 -.41248150000000E-03
 0.21153520000000E-03 -.17302200000000E-04 -.60405900000000E-04
 -.70429971110000E+00 -.70274500430000E+00 0.71264910000000E-02
 0.69429200000000E-03 0.82418990000000E-03 -.22797600000000E-04
 0.58069300000000E-04 -.26620490000000E-03 -.19577500000000E-04
 0.52522860000000E-03 0.10471196000000E-02 -.20055100000000E-04
 -.20254190000000E-03 -.30534310000000E-03 -.11551600000000E-04
 -.29699300000000E-04 -.10250230000000E-03 0.31859280000000E-03
 -.34966780000000E-03 0.13462770000000E-03 0.19003000000000E-05
 vibration   59
 0.87712400000000E-04 -.44892000000000E-03 0.45096400000000E-04
 -.50199400000000E-04 -.29661230000000E-03 -.58114000000000E-04
 -.32429500000000E-03 0.42835440000000E-03 0.25354660000000E-03
 -.26417400000000E-04 -.38019360000000E-03 -.74321400000000E-04
 -.92150000000000E-06 0.53026550000000E-03 -.89835000000000E-05
 0.53509960000000E-03 0.11215600000000E-03 -.35117800000000E-03
 -.82827270000000E-03 -.52487930000000E-03 0.33520330000000E-03
 0.52511930000000E-03 0.20101830000000E-03 -.53353900000000E-04
 0.89014320000000E-03 -.15587105000000E-02 0.13160076000000E-02
 -.34528436900000E-01 0.30416592100000E-01 0.28829248600000E-01
 0.55057764000000E-02 0.98680640000000E-03 -.72654380000000E-03
 0.69899628290000E+00 0.17569792880000E+00 -.19872345280000E+00
 -.23548591770000E+00 -.57910032340000E+00 -.21735507330000E+00
 0.54189400000000E-03 0.39252800000000E-03 0.12910880000000E-03
 0.31427600000000E-04 0.32201460000000E-03 0.25458700000000E-04
 0.75023000000000E-05 0.47727800000000E-04 0.12252200000000E-04
 0.23832900000000E-04 -.41568570000000E-03 0.52635000000000E-04
 -.32247500000000E-04 0.12817720000000E-03 0.32326300000000E-03
 -.79295900000000E-04 -.20024850000000E-03 -.50690470000000E-03
 -.11053380000000E-03 -.16110890000000E-03 -.30001000000000E-05
 vibration   60
 -.77521100000000E-04 -.17168530000000E-03 -.16372000000000E-05
 0.92719000000000E-05 -.17699300000000E-04 0.13135800000000E-04
 -.12576070000000E-03 0.30021600000000E-04 -.59350400000000E-04
 0.81982000000000E-04 0.34404220000000E-03 -.50595600000000E-04
 0.54648700000000E-04 0.22660180000000E-03 0.30467800000000E-04
 0.41549700000000E-04 0.11937520000000E-03 0.88564400000000E-04
 0.11898530000000E-03 -.16628600000000E-04 -.11565790000000E-03
 0.23381820000000E-03 -.21889420000000E-03 0.15024670000000E-03
 -.10987172000000E-02 -.39783220000000E-03 -.11951470000000E-03
 -.62036535800000E-01 -.57389987800000E-01 -.49869857000000E-02
 0.89597800000000E-04 -.14685960000000E-03 -.17079230000000E-03
 0.61167652860000E+00 0.14682659240000E+00 -.19262941570000E+00
 0.25833962050000E+00 0.65152193880000E+00 0.26229443590000E+00
 0.35181420000000E-03 0.28516540000000E-03 0.54010000000000E-05
 0.49737000000000E-05 -.97494000000000E-05 0.17390000000000E-06
 -.47970000000000E-05 -.53532000000000E-05 -.52120000000000E-05
 -.48017800000000E-04 0.13443370000000E-03 -.84875000000000E-05
 0.58516500000000E-04 -.50160000000000E-05 -.58091100000000E-04
 0.67784000000000E-04 0.59393900000000E-04 0.96459100000000E-04
 -.47906000000000E-05 -.64000000000000E-08 0.23315000000000E-05
[GEOCONV]
energy
-.61869886150190E+03
-.61869930288150E+03
-.61869938391950E+03
-.61869947569210E+03
-.61869951972200E+03
-.61869955530600E+03
-.61869958571740E+03
-.61869962473400E+03
-.61869965632070E+03
-.61869966938950E+03
-.61869968601250E+03
-.61869969102450E+03
-.61869969597590E+03
-.61869969996030E+03
-.61869972333650E+03
-.61869976648380E+03
-.61869984800020E+03
-.61870015031530E+03
-.61870080942360E+03
-.61870108672710E+03
-.61870024935570E+03
-.61870189209910E+03
-.61870015560650E+03
-.61870159418990E+03
-.61870193521770E+03
-.61870249837970E+03
-.61870274474540E+03
-.61870270857610E+03
-.61870282199380E+03
-.61870285222380E+03
-.61870285583610E+03
-.61870286182590E+03
-.61870286646730E+03
-.61870287258180E+03
-.61870287451020E+03
-.61870287602920E+03
-.61870287747390E+03
-.61870287890910E+03
-.61870287889330E+03
-.61870287926080E+03
max-force
0.19354000000000E-01
0.10894000000000E-01
0.98990000000000E-02
0.61430000000000E-02
0.41200000000000E-02
0.38720000000000E-02
0.48320000000000E-02
0.30450000000000E-02
0.26510000000000E-02
0.19300000000000E-02
0.12280000000000E-02
0.11040000000000E-02
0.11020000000000E-02
0.12580000000000E-02
0.19800000000000E-02
0.47450000000000E-02
0.64870000000000E-02
0.81220000000000E-02
0.23126000000000E-01
0.23230000000000E-01
0.13147000000000E-01
0.85960000000000E-02
0.36512000000000E-01
0.15216000000000E-01
0.12386000000000E-01
0.10074000000000E-01
0.56530000000000E-02
0.70700000000000E-02
0.32350000000000E-02
0.19610000000000E-02
0.17620000000000E-02
0.15350000000000E-02
0.12160000000000E-02
0.86600000000000E-03
0.85000000000000E-03
0.62400000000000E-03
0.55500000000000E-03
0.36500000000000E-03
0.23700000000000E-03
0.13900000000000E-03
[GEOMETRIES] XYZ
    20

 c  -.16728234543432E+01 -.89605729830012E+00 0.26870930103901E-02
 n  -.33322386273688E+00 -.12573892264753E+01 -.10358738082921E-01
 c  0.36641674454217E+00 -.35417365439455E-01 0.90004400645361E-01
 c  -.67808435612108E+00 0.97253468869254E+00 0.61714183981347E-01
 n  -.19058643670719E+01 0.46148280317903E+00 -.23796966386234E-01
 n  0.16544788565402E+01 0.21783052729166E+00 -.53875166214502E-01
 c  0.19575617632067E+01 0.15727364260077E+01 0.16237362509742E-01
 n  0.11067415002881E+01 0.26179115015289E+01 -.36527003133853E-01
 c  -.21425487622430E+00 0.23134888944136E+01 -.15895475616283E-01
 n  -.11023563264865E+01 0.33121870379718E+01 -.28878440539090E-02
 h  0.30121435404343E+01 0.18067288917967E+01 0.45754553038822E-01
 h  -.20884912835443E+01 0.30873017879900E+01 0.56203853737684E-01
 h  -.77596098329880E+00 0.42679310755879E+01 0.16335576391377E-01
 h  -.24281704393845E+01 -.16632745185808E+01 -.16490275174803E-01
 c  0.90213037906388E-01 -.26068269908674E+01 -.83499434216769E-02
 c  0.15720790025876E+01 -.28130162112276E+01 0.18294876753030E-01
 h  0.17547737108852E+01 -.38838162865126E+01 -.21375969599782E-01
 h  0.20633960849568E+01 -.23136935713218E+01 -.82016434334320E+00
 h  0.20173741752569E+01 -.23973088346805E+01 0.92681056870585E+00
 o  -.78287386204715E+00 -.34958793227547E+01 -.23851975851075E-01
    20

 c  -.16812906318808E+01 -.91347453044430E+00 0.56036087403633E-02
 n  -.33696394579148E+00 -.12605196718948E+01 -.63286120621156E-02
 c  0.36387149217910E+00 -.39839548714488E-01 0.95982764141542E-01
 c  -.67959869664700E+00 0.96799368961973E+00 0.71193952984474E-01
 n  -.18999745567009E+01 0.44346235245809E+00 -.12361120095935E-01
 n  0.16413529226633E+01 0.24001372229766E+00 -.51690477702409E-01
 c  0.19608213124448E+01 0.15884986122067E+01 0.10565146780195E-01
 n  0.10985787827593E+01 0.26236751723636E+01 -.37626074628072E-01
 c  -.21843697181599E+00 0.23093738917524E+01 -.10638387796564E-01
 n  -.11133945235625E+01 0.33028773173181E+01 -.16052624371499E-01
 h  0.30157397340703E+01 0.18215049077399E+01 0.23960478835805E-01
 h  -.20962168809383E+01 0.30731788188700E+01 0.39741328941243E-01
 h  -.79332340511625E+00 0.42601258518598E+01 -.86799315177827E-02
 h  -.24369058599902E+01 -.16797018016857E+01 -.23916107933110E-01
 c  0.98176902037501E-01 -.26048400779324E+01 -.92806054455135E-02
 c  0.15820812855610E+01 -.27911695225908E+01 0.23481872687725E-01
 h  0.17834389030438E+01 -.38578451349316E+01 -.21370308041249E-01
 h  0.20685709156365E+01 -.22796782035964E+01 -.80903738210879E+00
 h  0.20137388413754E+01 -.23738037377830E+01 0.93658692312682E+00
 o  -.75984473011213E+00 -.35042850265402E+01 -.40358232012828E-01
    20

 c  -.16853343381635E+01 -.89650662824222E+00 0.91346565115718E-02
 n  -.34334299625707E+00 -.12595955890909E+01 -.11348288577199E-02
 c  0.36076945762792E+00 -.41650433271971E-01 0.10064866213997E+00
 c  -.67843069271739E+00 0.97040146212892E+00 0.76210739652815E-01
 n  -.18990764677825E+01 0.45499227889952E+00 -.64326834003667E-02
 n  0.16339878274204E+01 0.22655767481695E+00 -.51098956582520E-01
 c  0.19632369655525E+01 0.15669210615300E+01 0.39027855524023E-02
 n  0.11067786238325E+01 0.26074672277164E+01 -.46016539548272E-01
 c  -.21067165941134E+00 0.23090508415701E+01 -.11986909652059E-01
 n  -.11002612016376E+01 0.33091088288471E+01 -.16040952310680E-01
 h  0.30195913403360E+01 0.17915559911035E+01 0.13631234277237E-01
 h  -.20838239795969E+01 0.30863375245559E+01 0.46441671693546E-01
 h  -.77395034117324E+00 0.42638610425624E+01 -.14025706265437E-01
 h  -.24466124213706E+01 -.16562337305125E+01 -.22214017601497E-01
 c  0.92262518941736E-01 -.26009407385729E+01 -.86121826780557E-02
 c  0.15758239080234E+01 -.27881742226286E+01 0.37202358644314E-01
 h  0.17856683199778E+01 -.38525934244973E+01 -.13926003039412E-01
 h  0.20652934480636E+01 -.22675177995077E+01 -.78722513220217E+00
 h  0.19937624730448E+01 -.23762515171722E+01 0.95835727668417E+00
 o  -.76160046185332E+00 -.34981936708301E+01 -.60742384395940E-01
    20

 c  -.16904499609115E+01 -.89947403277340E+00 0.90080994433704E-02
 n  -.33978346105703E+00 -.12607650924519E+01 0.91686943652013E-03
 c  0.36126050859030E+00 -.41388792346095E-01 0.10727275415026E+00
 c  -.67873660393054E+00 0.97070260441120E+00 0.84021789204583E-01
 n  -.19016809255854E+01 0.45475068412529E+00 -.26207700519166E-02
 n  0.16369626344980E+01 0.23152358677722E+00 -.51429152878176E-01
 c  0.19658648873078E+01 0.15747608822230E+01 -.45005666114127E-02
 n  0.11045376244337E+01 0.26124131538475E+01 -.55537299876090E-01
 c  -.21117225006058E+00 0.23094778628560E+01 -.11876774037889E-01
 n  -.11037881467399E+01 0.33077751972566E+01 -.13329840779952E-01
 h  0.30212198218529E+01 0.18023407497396E+01 -.58521602084395E-03
 h  -.20863250159470E+01 0.30824878336383E+01 0.57469286456812E-01
 h  -.78002424778900E+00 0.42636470467310E+01 -.17364585143690E-01
 h  -.24511699663998E+01 -.16598032349578E+01 -.26254931048571E-01
 c  0.94763420450181E-01 -.26037386638622E+01 -.10794855607877E-01
 c  0.15778607058956E+01 -.27927056934448E+01 0.52690102589701E-01
 h  0.17824825979559E+01 -.38578123320840E+01 -.65445065538836E-02
 h  0.20809102605133E+01 -.22654237227264E+01 -.75941609079741E+00
 h  0.19863865328507E+01 -.23911139588901E+01 0.98281472181632E+00
 o  -.76088721642283E+00 -.35024320251867E+01 -.77221464172047E-01
    20

 c  -.16876393160865E+01 -.90175701911254E+00 0.10437234487825E-01
 n  -.34055072586972E+00 -.12604151081180E+01 0.29788303329025E-02
 c  0.36085756576330E+00 -.42054562141010E-01 0.11046012495638E+00
 c  -.67903443665428E+00 0.97021003462876E+00 0.89193411048543E-01
 n  -.19003501473566E+01 0.45052883594041E+00 0.16071038028541E-02
 n  0.16350161983206E+01 0.23334168576281E+00 -.54313641534318E-01
 c  0.19656716374328E+01 0.15750821971584E+01 -.10885776834952E-01
 n  0.11029468556756E+01 0.26124936050367E+01 -.60964405844164E-01
 c  -.21122746199936E+00 0.23089340644523E+01 -.11458128423377E-01
 n  -.11052973840427E+01 0.33060706893974E+01 -.12134924314030E-01
 h  0.30209286766769E+01 0.18023149671599E+01 -.10336904210646E-01
 h  -.20870187429202E+01 0.30795007921120E+01 0.63721272146988E-01
 h  -.78301484685723E+00 0.42622695564391E+01 -.20286420442413E-01
 h  -.24467376814035E+01 -.16633131825492E+01 -.26874856343191E-01
 c  0.94870142494874E-01 -.26016809138648E+01 -.12522883252528E-01
 c  0.15774006589284E+01 -.27893517199659E+01 0.67036234079152E-01
 h  0.17846087524205E+01 -.38532482144281E+01 -.17110336164176E-02
 h  0.20887844261756E+01 -.22517033282823E+01 -.73274709626251E+00
 h  0.19730106801416E+01 -.23973597494931E+01 0.10066813523876E+01
 o  -.75791090390181E+00 -.35007851983350E+01 -.91883936771036E-01
    20

 c  -.16882822859712E+01 -.90053684271245E+00 0.93707643914914E-02
 n  -.34065330781734E+00 -.12608666212280E+01 0.49760347913594E-02
 c  0.36183454139797E+00 -.43966399940841E-01 0.11620214489794E+00
 c  -.67664842218725E+00 0.96993027276619E+00 0.95877706916135E-01
 n  -.18983167854937E+01 0.45128671198891E+00 0.37046410926325E-02
 n  0.16343550438220E+01 0.23482980881249E+00 -.55877190569875E-01
 c  0.19677082213780E+01 0.15751009858106E+01 -.15572789318507E-01
 n  0.11023670279337E+01 0.26121299064224E+01 -.66787018776849E-01
 c  -.21168036122413E+00 0.23096181186668E+01 -.11049522550480E-01
 n  -.11070485649605E+01 0.33059738727916E+01 -.11633245373390E-01
 h  0.30229786763764E+01 0.18022685739298E+01 -.13941359939067E-01
 h  -.20879471014295E+01 0.30784920037769E+01 0.70076796716414E-01
 h  -.78603095514749E+00 0.42624650816908E+01 -.24172683013302E-01
 h  -.24481386077772E+01 -.16611247256408E+01 -.30509607452134E-01
 c  0.94180131422940E-01 -.26017638807954E+01 -.15653568178120E-01
 c  0.15760450644246E+01 -.27905444786920E+01 0.75644464806577E-01
 h  0.17840928247726E+01 -.38534475015345E+01 -.38383779403988E-02
 h  0.20949232960983E+01 -.22425992128361E+01 -.71215302508322E+00
 h  0.19618600581104E+01 -.24100674827194E+01 0.10241780860321E+01
 o  -.75812106805511E+00 -.35006378061712E+01 -.10083520433937E+00
    20

 c  -.16950963032963E+01 -.89851583266611E+00 0.63238829404980E-02
 n  -.34456284317967E+00 -.12600681394839E+01 0.11833973905026E-01
 c  0.35711247374909E+00 -.46272115013576E-01 0.13776094850877E+00
 c  -.67836351019505E+00 0.97132909410392E+00 0.12159905168903E+00
 n  -.18986447159182E+01 0.45035344305936E+00 0.11876592663038E-01
 n  0.16253681403878E+01 0.23157710785825E+00 -.63389745963805E-01
 c  0.19692457402255E+01 0.15650407061749E+01 -.31648822145834E-01
 n  0.11050369552274E+01 0.26092502770701E+01 -.87497330107303E-01
 c  -.20646419810934E+00 0.23081863752919E+01 -.93074835057244E-02
 n  -.11010417784652E+01 0.33060545335718E+01 -.11905871375116E-01
 h  0.30255431514437E+01 0.17864574046900E+01 -.24773198692503E-01
 h  -.20799403454922E+01 0.30806470213320E+01 0.90855434590626E-01
 h  -.77971352624819E+00 0.42617222233938E+01 -.40729027400314E-01
 h  -.24553428160025E+01 -.16580312933954E+01 -.40879405404081E-01
 c  0.95534227121832E-01 -.25968980735313E+01 -.27804503105671E-01
 c  0.15750336828974E+01 -.27817619147940E+01 0.10844609171030E+00
 h  0.17953021698950E+01 -.38382079224623E+01 -.11806232027113E-01
 h  0.21179541168992E+01 -.21914652799998E+01 -.63095410348856E+00
 h  0.19188851523016E+01 -.24446239044264E+01 0.10895858149373E+01
 o  -.74957910321403E+00 -.34989693176797E+01 -.13466045056998E+00
    20

 c  -.16923601353793E+01 -.90086192229074E+00 0.77035370292175E-02
 n  -.34207696331649E+00 -.12610326810626E+01 0.79640835712077E-02
 c  0.36004529822235E+00 -.46554147292506E-01 0.13058596081296E+00
 c  -.67685029707421E+00 0.96979025707214E+00 0.11565830479560E+00
 n  -.18970015595128E+01 0.44802486656618E+00 0.10413463991461E-01
 n  0.16280331831581E+01 0.23839283788622E+00 -.66875743669219E-01
 c  0.19688829764870E+01 0.15732426812661E+01 -.26716640845149E-01
 n  0.11013564063192E+01 0.26128515053913E+01 -.79290575428549E-01
 c  -.20927579454885E+00 0.23082309849704E+01 -.82691389780580E-02
 n  -.11064071546948E+01 0.33034959138909E+01 -.12693696818705E-01
 h  0.30242737922120E+01 0.17983628770207E+01 -.22647759760416E-01
 h  -.20854997092226E+01 0.30755602776444E+01 0.83746262800230E-01
 h  -.78715494957452E+00 0.42600337695989E+01 -.36522101804814E-01
 h  -.24524407940452E+01 -.16608420874184E+01 -.34634639404352E-01
 c  0.96039255377897E-01 -.25993507432659E+01 -.24505966043716E-01
 c  0.15758307088942E+01 -.27860129405179E+01 0.10290008122742E+00
 h  0.17924316189704E+01 -.38446063147491E+01 -.50363596348450E-02
 h  0.21154462515963E+01 -.22072024413218E+01 -.64776429237844E+00
 h  0.19275735213311E+01 -.24375614919876E+01 0.10770597367688E+01
 o  -.75108632676628E+00 -.35001925057020E+01 -.12634195124568E+00
    20

 c  -.16942832443547E+01 -.90310143295191E+00 0.68550587582471E-02
 n  -.34249507860787E+00 -.12619688005287E+01 0.55234966083539E-02
 c  0.35929752800351E+00 -.48648244765871E-01 0.13659652693813E+00
 c  -.67695131051256E+00 0.96895008457009E+00 0.12557033794146E+00
 n  -.18953182725705E+01 0.44374126882560E+00 0.12770092890987E-01
 n  0.16230598834595E+01 0.24582134978547E+00 -.78116791400763E-01
 c  0.19712886984432E+01 0.15765206473757E+01 -.26422196592170E-01
 n  0.11001297865069E+01 0.26139570564364E+01 -.79046788277325E-01
 c  -.20964800488102E+00 0.23069027494652E+01 -.56128987163091E-02
 n  -.11103811459647E+01 0.32998485330458E+01 -.17347503027558E-01
 h  0.30264349305436E+01 0.18017340886536E+01 -.26467570171000E-01
 h  -.20885474328663E+01 0.30705753573520E+01 0.83844042451418E-01
 h  -.79341343738950E+00 0.42568888069109E+01 -.43981727793391E-01
 h  -.24545743335523E+01 -.16627981334714E+01 -.32821941911358E-01
 c  0.97946665665632E-01 -.25990836030234E+01 -.26406336844971E-01
 c  0.15772452724862E+01 -.27808585316688E+01 0.11095923960887E+00
 h  0.18002892237931E+01 -.38375609874347E+01 -.13481670677246E-02
 h  0.21223760437289E+01 -.21930634168140E+01 -.62845479340815E+00
 h  0.19149888909365E+01 -.24395513983159E+01 0.10927155799183E+01
 o  -.74478094310039E+00 -.35023368960862E+01 -.13256686999885E+00
    20

 c  -.16950501561374E+01 -.90295198922296E+00 0.59318870769373E-02
 n  -.34284091189576E+00 -.12623844416632E+01 0.45209718151410E-02
 c  0.35954396849876E+00 -.49793342522783E-01 0.13949727746775E+00
 c  -.67608476687708E+00 0.96837561544514E+00 0.12806132364602E+00
 n  -.18943724483047E+01 0.44354063042592E+00 0.12756206530890E-01
 n  0.16219544682482E+01 0.24700249691586E+00 -.79737109501940E-01
 c  0.19708308151929E+01 0.15770495860157E+01 -.23304111182071E-01
 n  0.10986718440137E+01 0.26135354704725E+01 -.78370622449178E-01
 c  -.20955647139295E+00 0.23064544265359E+01 -.57288990160373E-02
 n  -.11099913974382E+01 0.32998111918766E+01 -.20361924382353E-01
 h  0.30257534140420E+01 0.18029134960622E+01 -.25303982584251E-01
 h  -.20880011850320E+01 0.30713448044568E+01 0.82301601833747E-01
 h  -.79260553616721E+00 0.42566469397605E+01 -.46557733330965E-01
 h  -.24559000963838E+01 -.16619260641847E+01 -.34603021330638E-01
 c  0.97937604793976E-01 -.25992869261541E+01 -.25129656892483E-01
 c  0.15778542538451E+01 -.27793415687927E+01 0.10687545302393E+00
 h  0.18017174496393E+01 -.38362788876833E+01 -.16646727140332E-02
 h  0.21197006954970E+01 -.21943694425330E+01 -.63712023253401E+00
 h  0.19185705299626E+01 -.24335213631086E+01 0.10859810806773E+01
 o  -.74394439728420E+00 -.35028384831869E+01 -.13042404014616E+00
    20

 c  -.16973402766278E+01 -.90196578275153E+00 0.45636621839956E-02
 n  -.34465039750438E+00 -.12620265668514E+01 0.43197186772781E-02
 c  0.35812123062737E+00 -.50229817749975E-01 0.14515541293610E+00
 c  -.67663684592362E+00 0.96848413993842E+00 0.13117354764715E+00
 n  -.18949969199513E+01 0.44413270509426E+00 0.12925102497185E-01
 n  0.16200644663159E+01 0.24527208602109E+00 -.78004325243907E-01
 c  0.19723712421290E+01 0.15741768146083E+01 -.17413465174695E-01
 n  0.11002614340769E+01 0.26108753964300E+01 -.79651999301257E-01
 c  -.20858063779581E+00 0.23061139075168E+01 -.76234776221273E-02
 n  -.11088147416214E+01 0.32999504771614E+01 -.25336945480117E-01
 h  0.30276078962885E+01 0.17986272436916E+01 -.20497389580606E-01
 h  -.20864544972517E+01 0.30724828556498E+01 0.81148356732225E-01
 h  -.79092460907677E+00 0.42565223038492E+01 -.50557192529011E-01
 h  -.24586330465407E+01 -.16601020286872E+01 -.40218591789571E-01
 c  0.97556437145994E-01 -.25981945715208E+01 -.22351111331643E-01
 c  0.15789819113495E+01 -.27750405751773E+01 0.97119912697577E-01
 h  0.18036479270977E+01 -.38325757576461E+01 -.40526581710783E-02
 h  0.21115981864768E+01 -.21971641783170E+01 -.65905341868585E+00
 h  0.19297251106233E+01 -.24181524248147E+01 0.10685685355895E+01
 o  -.74229022825796E+00 -.35030133962132E+01 -.12674978580781E+00
    20

 c  -.16982428787385E+01 -.90204873886943E+00 0.55219561767364E-02
 n  -.34529139672794E+00 -.12619185026514E+01 0.51509681421033E-02
 c  0.35763577206900E+00 -.50282806179964E-01 0.14651189373877E+00
 c  -.67694090735227E+00 0.96838880326768E+00 0.13162753753132E+00
 n  -.18954214877902E+01 0.44382049651136E+00 0.13970836252650E-01
 n  0.16197566043419E+01 0.24516268699390E+00 -.76379747599509E-01
 c  0.19734553753912E+01 0.15738608795758E+01 -.15507083337430E-01
 n  0.11005308807869E+01 0.26102815044357E+01 -.81331096132944E-01
 c  -.20841178692854E+00 0.23061276173939E+01 -.88221883082733E-02
 n  -.11089073621249E+01 0.32999113618436E+01 -.27042497317845E-01
 h  0.30287967737518E+01 0.17977528007164E+01 -.17105664661044E-01
 h  -.20863269254605E+01 0.30721364624836E+01 0.81386911598713E-01
 h  -.79131691687950E+00 0.42566354609896E+01 -.51452619510057E-01
 h  -.24594842628818E+01 -.16601603102922E+01 -.40348693314325E-01
 c  0.97504013729126E-01 -.25976856755600E+01 -.21963838910495E-01
 c  0.15793556678575E+01 -.27738283925094E+01 0.95077030270552E-01
 h  0.18037517321692E+01 -.38314879468941E+01 -.44873126036451E-02
 h  0.21087977201371E+01 -.21980016130284E+01 -.66506139824332E+00
 h  0.19337534152658E+01 -.24133585246063E+01 0.10637668218668E+01
 o  -.74124270985030E+00 -.35033206128779E+01 -.12767477750344E+00
    20

 c  -.17001071920588E+01 -.90302342177621E+00 0.84746289848172E-02
 n  -.34619767346115E+00 -.12621715191892E+01 0.63921454422142E-02
 c  0.35696186108920E+00 -.50722970516971E-01 0.14689213137768E+00
 c  -.67723159866238E+00 0.96766200997600E+00 0.13138446742146E+00
 n  -.18957541424688E+01 0.44215595461743E+00 0.16379988293872E-01
 n  0.16189448745902E+01 0.24706316817520E+00 -.73924208609841E-01
 c  0.19755244712627E+01 0.15749849575060E+01 -.10898037221014E-01
 n  0.10995896132172E+01 0.26097300008438E+01 -.83822598524021E-01
 c  -.20818517134356E+00 0.23058474544648E+01 -.10788066044383E-01
 n  -.11098752853883E+01 0.32990044363308E+01 -.30512191028696E-01
 h  0.30307716258199E+01 0.17982819883607E+01 -.90370846043704E-02
 h  -.20865637036775E+01 0.30698454024906E+01 0.81365701488099E-01
 h  -.79354953303104E+00 0.42561907319055E+01 -.51577565864229E-01
 h  -.24612744802676E+01 -.16612330998827E+01 -.36709457063100E-01
 c  0.98169013881051E-01 -.25969571668638E+01 -.22251083846442E-01
 c  0.15807321938680E+01 -.27718058731648E+01 0.91858184742210E-01
 h  0.18050117451127E+01 -.38297835622333E+01 -.39695795247824E-02
 h  0.21046400237506E+01 -.21997837285978E+01 -.67534442454702E+00
 h  0.19409423152244E+01 -.24044613111887E+01 0.10554730834669E+01
 o  -.73903479400482E+00 -.35034689375368E+01 -.12906389671121E+00
    20

 c  -.17017142581365E+01 -.90322139920745E+00 0.99916511788952E-02
 n  -.34722595886248E+00 -.12621356241938E+01 0.67757412755624E-02
 c  0.35597725201957E+00 -.50779896691934E-01 0.14583783686392E+00
 c  -.67770393091702E+00 0.96741886999347E+00 0.13019548672382E+00
 n  -.18962910599899E+01 0.44170428408980E+00 0.17363440366916E-01
 n  0.16180975225010E+01 0.24755836772305E+00 -.71867390159376E-01
 c  0.19769518743025E+01 0.15748372141444E+01 -.77006557999147E-02
 n  0.10996100012368E+01 0.26086587987675E+01 -.85027221991815E-01
 c  -.20770836151853E+00 0.23057109328913E+01 -.11987981301421E-01
 n  -.11097635638202E+01 0.32989753836840E+01 -.31995317668917E-01
 h  0.30322145688860E+01 0.17973986350854E+01 -.48383060258711E-02
 h  -.20860657248727E+01 0.30693693051560E+01 0.81913561204373E-01
 h  -.79375313860177E+00 0.42562637866210E+01 -.49731258295942E-01
 h  -.24629109796812E+01 -.16614109583388E+01 -.33763675921427E-01
 c  0.98361728992366E-01 -.25964385553157E+01 -.22314674439931E-01
 c  0.15813891694252E+01 -.27696940381513E+01 0.89322933425417E-01
 h  0.18063295668230E+01 -.38278132245608E+01 -.25833491753295E-02
 h  0.21016178889209E+01 -.22008303758191E+01 -.68285559035814E+00
 h  0.19447908847912E+01 -.23969849171825E+01 0.10494916748216E+01
 o  -.73694701243610E+00 -.35043996538385E+01 -.12854988557508E+00
    20

 c  -.17092310289870E+01 -.90363715894062E+00 0.13660271982294E-01
 n  -.35184610148514E+00 -.12617771769883E+01 0.62141903957868E-02
 c  0.35066302304183E+00 -.50930473387137E-01 0.13757393605158E+00
 c  -.68023605141275E+00 0.96633642619800E+00 0.12392907849539E+00
 n  -.18987938354994E+01 0.44051037629258E+00 0.19307761285961E-01
 n  0.16130882148952E+01 0.24846488856393E+00 -.64718119509399E-01
 c  0.19831894096268E+01 0.15720681358014E+01 0.43083392501444E-02
 n  0.11007244276560E+01 0.26017350339333E+01 -.89025655904792E-01
 c  -.20502478126911E+00 0.23045952947971E+01 -.15699503213440E-01
 n  -.11078037807248E+01 0.32995982310284E+01 -.34127491033712E-01
 h  0.30385784073356E+01 0.17913397075828E+01 0.57467936602237E-02
 h  -.20824286362652E+01 0.30694134065833E+01 0.89154917244466E-01
 h  -.79175349802136E+00 0.42565866182609E+01 -.34858168467674E-01
 h  -.24706504982764E+01 -.16616203401526E+01 -.19428620808830E-01
 c  0.99819779726336E-01 -.25941092243996E+01 -.22926518372296E-01
 c  0.15843155094078E+01 -.27587035113640E+01 0.81473157864605E-01
 h  0.18153866814672E+01 -.38164938818559E+01 0.40280223663624E-02
 h  0.20945203105708E+01 -.21986127711649E+01 -.70376352805482E+00
 h  0.19521962337959E+01 -.23695188304424E+01 0.10329522267122E+01
 o  -.72833089598179E+00 -.35070025531400E+01 -.12339537311431E+00
    20

 c  -.17181639287597E+01 -.90592106738202E+00 0.20661626451880E-01
 n  -.35631796827673E+00 -.12617447072268E+01 0.65558558178030E-02
 c  0.34479945140225E+00 -.51681014878594E-01 0.12646287976551E+00
 c  -.68304321109969E+00 0.96378894799850E+00 0.11676885951040E+00
 n  -.19013727382437E+01 0.43672709593862E+00 0.23501870907755E-01
 n  0.16072261138040E+01 0.25111538070638E+00 -.56735832254020E-01
 c  0.19914642774049E+01 0.15700779690731E+01 0.17410695309289E-01
 n  0.11006379718690E+01 0.25931332191451E+01 -.96436864688201E-01
 c  -.20217892250121E+00 0.23026400833776E+01 -.20454439491383E-01
 n  -.11070782289848E+01 0.32990256721418E+01 -.35780735913503E-01
 h  0.30467011152884E+01 0.17862372691214E+01 0.18466818684602E-01
 h  -.20787626132593E+01 0.30667529543585E+01 0.10177678478842E+00
 h  -.79201140906699E+00 0.42556095519265E+01 -.15789451974601E-01
 h  -.24792374603747E+01 -.16642088930231E+01 0.43133277340628E-02
 c  0.10349884808735E+00 -.25908123644452E+01 -.25763142566427E-01
 c  0.15891969804426E+01 -.27461088781349E+01 0.78264246962935E-01
 h  0.18278210292724E+01 -.38029143254847E+01 0.11161220123292E-01
 h  0.20931405008649E+01 -.21901865982325E+01 -.71411315700228E+00
 h  0.19558929817268E+01 -.23453313035806E+01 0.10249190819595E+01
 o  -.72026033572035E+00 -.35049818080896E+01 -.12327122667826E+00
    20

 c  -.17223510783794E+01 -.90849267942043E+00 0.20328240688429E-01
 n  -.35864007031840E+00 -.12605719183131E+01 0.48860973510404E-02
 c  0.34287519066447E+00 -.52473750715045E-01 0.12297034543213E+00
 c  -.68531036392862E+00 0.96225211298559E+00 0.11458278520555E+00
 n  -.19044188196351E+01 0.43152269615716E+00 0.23995559890111E-01
 n  0.16091413238374E+01 0.25428513693293E+00 -.54615493982438E-01
 c  0.20003491751110E+01 0.15727597420286E+01 0.27085995067579E-01
 n  0.10989655148835E+01 0.25890676964788E+01 -.95395795757667E-01
 c  -.20414126495816E+00 0.23038970119191E+01 -.21767855428654E-01
 n  -.11097279806352E+01 0.33015861608642E+01 -.39762520550614E-01
 h  0.30546945340485E+01 0.17922986128854E+01 0.25130372099354E-01
 h  -.20807473714946E+01 0.30689490746072E+01 0.10142863282303E+00
 h  -.79495859654584E+00 0.42581018715152E+01 -.96337222521964E-02
 h  -.24822778606207E+01 -.16680442972142E+01 0.64716327477262E-02
 c  0.10417455806255E+00 -.25890666949231E+01 -.25075552644786E-01
 c  0.15912354751136E+01 -.27408477340331E+01 0.68029925709241E-01
 h  0.18324130694295E+01 -.37969762331146E+01 0.46970661956131E-03
 h  0.20864798485964E+01 -.21855105596175E+01 -.73040434056187E+00
 h  0.19641927922659E+01 -.23360671066635E+01 0.10104873671725E+01
 o  -.71479199622080E+00 -.35091352968420E+01 -.11443311820376E+00
    20

 c  -.17320378310769E+01 -.91069599908683E+00 0.20464429463618E-01
 n  -.36356500369182E+00 -.12585062902447E+01 0.18821975591434E-02
 c  0.33529040370253E+00 -.51037741534237E-01 0.10239475250502E+00
 c  -.69074053470811E+00 0.95976279491596E+00 0.99738781001508E-01
 n  -.19102750608813E+01 0.42725544456982E+00 0.26525366043158E-01
 n  0.16031998798390E+01 0.25268631540538E+00 -.52173719527342E-01
 c  0.20147827773423E+01 0.15669717403810E+01 0.40375477355403E-01
 n  0.10983454918123E+01 0.25706738893105E+01 -.92118477068704E-01
 c  -.20267718292962E+00 0.23031475625013E+01 -.26014072958262E-01
 n  -.11026917197846E+01 0.33079554003728E+01 -.36284988257664E-01
 h  0.30678272026101E+01 0.17866049701948E+01 0.30979210217104E-01
 h  -.20724711710307E+01 0.30784922035596E+01 0.11361068700522E+00
 h  -.78361275577002E+00 0.42613418381240E+01 0.18880089517365E-01
 h  -.24906712816643E+01 -.16712329872532E+01 0.12274170872891E-01
 c  0.10704842204489E+00 -.25839773954494E+01 -.18468782239490E-01
 c  0.15958418499343E+01 -.27294337546945E+01 0.61254742413341E-01
 h  0.18361370844555E+01 -.37880644116247E+01 0.32134711954307E-01
 h  0.20804639402054E+01 -.22069724854548E+01 -.76558084092096E+00
 h  0.19794597926852E+01 -.22849030838503E+01 0.98122894113601E+00
 o  -.70862911971627E+00 -.35029964738680E+01 -.10347708893114E+00
    20

 c  -.17656567177451E+01 -.91160509866472E+00 0.22488557801616E-02
 n  -.38096109051781E+00 -.12494965556911E+01 -.15107240740308E-01
 c  0.31288184848532E+00 -.50043444653489E-01 0.46237432339651E-01
 c  -.70667654074577E+00 0.95214138251372E+00 0.67066958029755E-01
 n  -.19272400281537E+01 0.41280188035746E+00 0.21773069472142E-01
 n  0.15843090839641E+01 0.25597535062435E+00 -.73808248221561E-01
 c  0.20658590589635E+01 0.15452597078024E+01 0.64955475207862E-01
 n  0.10965805072929E+01 0.25077667282232E+01 -.55729435478484E-01
 c  -.20044636806193E+00 0.23001910273864E+01 -.21146437874697E-01
 n  -.10827433646719E+01 0.33318889805365E+01 -.24040779523971E-01
 h  0.31116272823270E+01 0.17725909884347E+01 0.16041045222405E-03
 h  -.20527410787701E+01 0.31178835926587E+01 0.12928545120744E+00
 h  -.74988043078846E+00 0.42728636192598E+01 0.87278983156422E-01
 h  -.25218804221445E+01 -.16733485457715E+01 0.55639078698840E-02
 c  0.11166643492849E+00 -.25669966105086E+01 -.65014031828186E-02
 c  0.16041692905858E+01 -.26870339827299E+01 0.47476468842357E-01
 h  0.18626760208649E+01 -.37406594356932E+01 0.12417992575749E-01
 h  0.20745464332122E+01 -.21523523844083E+01 -.77846738881866E+00
 h  0.19773660131278E+01 -.22384508406332E+01 0.97030565616278E+00
 o  -.67896969470827E+00 -.34989376356586E+01 -.48655907719343E-01
    20

 c  -.17694089631678E+01 -.88765709055186E+00 -.21168212241132E-01
 n  -.38584284610365E+00 -.12323339122354E+01 -.27722072903006E-01
 c  0.30289418271239E+00 -.32410663442606E-01 -.55437664931006E-01
 c  -.71512003669258E+00 0.95931763015755E+00 -.36977523264957E-01
 n  -.19428745887588E+01 0.44320159040598E+00 -.19326294459488E-01
 n  0.15875711324811E+01 0.20388826934113E+00 -.64445586040892E-01
 c  0.20815640293097E+01 0.14978446256079E+01 0.74033172228852E-01
 n  0.11145261336154E+01 0.24511702010278E+01 0.15119250393843E-01
 c  -.19239116120775E+00 0.23009211653581E+01 -.16393340148619E-01
 n  -.10393949234725E+01 0.33625663029761E+01 0.33088890313744E-01
 h  0.31224816533962E+01 0.17285401354660E+01 -.34688932523639E-01
 h  -.20217243540730E+01 0.31720833162356E+01 0.12399004475391E+00
 h  -.68536367842704E+00 0.42839590905806E+01 0.21404722976056E+00
 h  -.25244685423119E+01 -.16505077481469E+01 -.13030003294025E-01
 c  0.99479604722306E-01 -.25566393153976E+01 0.23932173739940E-01
 c  0.15904525036717E+01 -.26932589223677E+01 -.89571359689854E-02
 h  0.18269545638819E+01 -.37528808851946E+01 -.10464610756684E-02
 h  0.20254408352627E+01 -.22179139193207E+01 -.88720515551588E+00
 h  0.20226115852453E+01 -.21993768062457E+01 0.86402683718134E+00
 o  -.70330741487251E+00 -.34772819839551E+01 0.69395741957765E-01
    20

 c  -.17324493785326E+01 -.90731358123162E+00 0.22053199920868E-01
 n  -.36425092547466E+00 -.12582619367349E+01 -.47340572908217E-02
 c  0.33602616846982E+00 -.48839922752596E-01 0.61965471252896E-01
 c  -.69093118538601E+00 0.96031725554433E+00 0.57918714367699E-01
 n  -.19125622153943E+01 0.43026037106274E+00 0.12423562284743E-01
 n  0.16080642953048E+01 0.25119703085962E+00 -.57561163787509E-01
 c  0.20150985279982E+01 0.15638140824719E+01 0.62134483069686E-01
 n  0.11008976196705E+01 0.25683657223151E+01 -.51338038830500E-01
 c  -.20349555113358E+00 0.23060953390124E+01 -.23524147181519E-01
 n  -.11014239403861E+01 0.33131405809972E+01 -.32538145029913E-01
 h  0.30678220405194E+01 0.17860507266132E+01 0.48273657775170E-01
 h  -.20750352989732E+01 0.30818072636098E+01 0.85781144488816E-01
 h  -.78368973864615E+00 0.42645753433992E+01 0.49848477470398E-01
 h  -.24908550186025E+01 -.16680732455486E+01 0.29268535244820E-01
 c  0.10400405953857E+00 -.25857360956388E+01 -.11100922533197E-01
 c  0.15944563144223E+01 -.27304572749929E+01 0.24061493546054E-01
 h  0.18351820091921E+01 -.37880899664230E+01 -.22546621132487E-01
 h  0.20544004638281E+01 -.21989576003259E+01 -.81063431574707E+00
 h  0.20028408765661E+01 -.22946746182503E+01 0.93735813637083E+00
 o  -.70961889411089E+00 -.35098796065326E+01 -.48174900632810E-01
    20

 c  -.17673600752410E+01 -.89626462967949E+00 0.11420405690545E-01
 n  -.38472262284379E+00 -.12453626572422E+01 -.10252900886539E-01
 c  0.31238482685111E+00 -.43087945397290E-01 -.50867740843149E-03
 c  -.70529121541707E+00 0.95825690211897E+00 0.18685264942547E-02
 n  -.19312186766758E+01 0.43305364331331E+00 0.18123349371666E-02
 n  0.15928462185973E+01 0.23592755180553E+00 -.40338615701241E-01
 c  0.20629879828969E+01 0.15287766805823E+01 0.10351551881543E+00
 n  0.11098771693265E+01 0.24994601426181E+01 -.19062509697201E-01
 c  -.19467906241689E+00 0.23053049502311E+01 -.27819873802750E-01
 n  -.10727310438410E+01 0.33418255541953E+01 -.23767043979595E-01
 h  0.31099524625509E+01 0.17496168001339E+01 0.14399062653011E-01
 h  -.20464556571608E+01 0.31214951274884E+01 0.99236942026968E-01
 h  -.74327741457819E+00 0.42763048152744E+01 0.13986392215207E+00
 h  -.25239140637468E+01 -.16575861132817E+01 0.31557493166902E-01
 c  0.10101294780389E+00 -.25686940019906E+01 0.93259810285225E-03
 c  0.15942593781519E+01 -.26941564011098E+01 -.34468005460820E-01
 h  0.18482626913010E+01 -.37479288007396E+01 -.90198515103761E-01
 h  0.20034292536991E+01 -.21603749554951E+01 -.89349653722727E+00
 h  0.20346446228316E+01 -.22452696137451E+01 0.85662720998591E+00
 o  -.68499666662843E+00 -.35089320876112E+01 0.29000388943281E-01
    20

 c  -.17960035217511E+01 -.87888671286699E+00 0.14970630041134E-02
 n  -.40151278407360E+00 -.12290664438730E+01 0.18524400207461E-03
 c  0.29590198973265E+00 -.35736287589516E-01 -.48729031279456E-01
 c  -.71423751102880E+00 0.95815619540814E+00 -.54924188697878E-01
 n  -.19475025545985E+01 0.44226248729156E+00 -.57146310882821E-02
 n  0.15872368808766E+01 0.21371574906943E+00 0.19065154177068E-01
 c  0.21103836071125E+01 0.14937709303085E+01 0.14327433793410E+00
 n  0.11175619449217E+01 0.24256728417934E+01 -.15668130509278E-02
 c  -.18664676007216E+00 0.23069394025891E+01 -.31697470055461E-01
 n  -.10447239201653E+01 0.33723701398821E+01 -.28154869049581E-01
 h  0.31344262483303E+01 0.17052001401671E+01 -.99808309077358E-01
 h  -.20126472133717E+01 0.31481822082530E+01 0.12437803475934E+00
 h  -.71111939101975E+00 0.42795978172146E+01 0.23914472524256E+00
 h  -.25480047569901E+01 -.16446473155122E+01 0.13979502501179E-01
 c  0.93234504426909E-01 -.25524080288770E+01 0.68994566708679E-02
 c  0.15846979201910E+01 -.26695722325000E+01 -.11966003017366E+00
 h  0.18440401190322E+01 -.37186308140756E+01 -.21801510600732E+00
 h  0.19205883972756E+01 -.21135285450692E+01 -.99699769936936E+00
 h  0.20828251551366E+01 -.22313316362009E+01 0.74440637131738E+00
 o  -.67210818127778E+00 -.35036582192284E+01 0.10390338634613E+00
    20

 c  -.17536415178813E+01 -.90105710436624E+00 0.17828426446617E-01
 n  -.37662720525583E+00 -.12502663426655E+01 0.11723314712895E-02
 c  0.32192552537624E+00 -.44219214649129E-01 0.39122005595496E-01
 c  -.70068011419418E+00 0.95900687711252E+00 0.32515404169937E-01
 n  -.19263662479273E+01 0.43127222876942E+00 0.11700642997272E-01
 n  0.16041069203995E+01 0.24002748783394E+00 -.17156687050304E-01
 c  0.20482271715269E+01 0.15466233997848E+01 0.90611106584672E-01
 n  0.11068013896255E+01 0.25270445045278E+01 -.53701557975095E-01
 c  -.19988277830145E+00 0.23066016016354E+01 -.30302500533494E-01
 n  -.10878714215322E+01 0.33322440774607E+01 -.39361585803046E-01
 h  0.30964957821343E+01 0.17644655722785E+01 -.15744588628311E-01
 h  -.20570419188909E+01 0.31021948158127E+01 0.11180273828642E+00
 h  -.76319056999909E+00 0.42721558580636E+01 0.11280550070491E+00
 h  -.25084867870496E+01 -.16650922625583E+01 0.27060866217582E-01
 c  0.10243987959750E+00 -.25764241045344E+01 -.92432698676846E-02
 c  0.15957417454993E+01 -.27092889050559E+01 -.22361025288514E-01
 h  0.18466606297457E+01 -.37635248419677E+01 -.80109721285365E-01
 h  0.20147456329164E+01 -.21723706857946E+01 -.87530876350469E+00
 h  0.20330522774890E+01 -.22684393666378E+01 0.87413114110990E+00
 o  -.69707626117279E+00 -.35115406273902E+01 -.13233045027754E-01
    20

 c  -.17569767037726E+01 -.90131659372681E+00 0.25983741902314E-01
 n  -.37791308077648E+00 -.12510024608616E+01 0.37687203944661E-02
 c  0.32159238002635E+00 -.44929193052853E-01 0.33209399247843E-01
 c  -.70022721955253E+00 0.95805742822884E+00 0.26473172123308E-01
 n  -.19262363101996E+01 0.42802598985416E+00 0.17920188397369E-01
 n  0.16033335437451E+01 0.24458507325234E+00 -.88586613778917E-02
 c  0.20529594707998E+01 0.15482996029522E+01 0.10971468692879E+00
 n  0.11041706745115E+01 0.25224264671706E+01 -.53441095461605E-01
 c  -.20002065153558E+00 0.23070360510258E+01 -.31993967625633E-01
 n  -.10895242022065E+01 0.33324844172333E+01 -.55002574865721E-01
 h  0.30978544700075E+01 0.17642898286602E+01 -.31730114644910E-01
 h  -.20536103187466E+01 0.30956839377673E+01 0.11754347498538E+00
 h  -.76746373545630E+00 0.42676041015134E+01 0.12870318395029E+00
 h  -.25106593848772E+01 -.16663698306499E+01 0.42902231222082E-01
 c  0.10311476631679E+00 -.25759072419919E+01 -.93017512718924E-02
 c  0.15969299144469E+01 -.27064208250142E+01 -.39103775001975E-01
 h  0.18505929898922E+01 -.37602232859540E+01 -.95235264749467E-01
 h  0.19994576433465E+01 -.21706869814869E+01 -.90099879320347E+00
 h  0.20460136506583E+01 -.22601116645540E+01 0.84847812188120E+00
 o  -.69406799792967E+00 -.35109470641179E+01 -.95233846881079E-02
    20

 c  -.17654024622899E+01 -.89631363374990E+00 0.23997003356364E-01
 n  -.38209187246278E+00 -.12463772184065E+01 -.11795798616747E-03
 c  0.31775289441116E+00 -.42233008230697E-01 0.18155977648623E-02
 c  -.70303234948210E+00 0.95751682464078E+00 0.72018455254863E-02
 n  -.19315044353585E+01 0.42584441625753E+00 0.24784999162775E-01
 n  0.16013004965779E+01 0.24039661210387E+00 -.10837723398163E-01
 c  0.20740911626453E+01 0.15375328668116E+01 0.13078900667046E+00
 n  0.11012755955962E+01 0.24936901548748E+01 -.38634198705842E-01
 c  -.20014143974239E+00 0.23074353308518E+01 -.25159017235025E-01
 n  -.10803753189522E+01 0.33454893478422E+01 -.65697892434611E-01
 h  0.31024880961404E+01 0.17542248520776E+01 -.10094588134044E+00
 h  -.20342908547671E+01 0.31041819900332E+01 0.15149808032426E+00
 h  -.75213972480445E+00 0.42602940796214E+01 0.19304675125127E+00
 h  -.25165853952445E+01 -.16639560335352E+01 0.43490342604473E-01
 c  0.10113220991930E+00 -.25704792849284E+01 -.45950331488472E-02
 c  0.15951531666571E+01 -.26998346173521E+01 -.49460411323034E-01
 h  0.18495317288099E+01 -.37545527748851E+01 -.93416076784875E-01
 h  0.19868051471077E+01 -.21714462389335E+01 -.92031935412459E+00
 h  0.20497047519513E+01 -.22417450096199E+01 0.82982490848237E+00
 o  -.69259995141728E+00 -.35033171793128E+01 0.92274100189527E-02
    20

 c  -.17602153153032E+01 -.89428302460791E+00 0.18479079161809E-01
 n  -.38101287278099E+00 -.12425255138586E+01 -.74847861437950E-02
 c  0.31820335915910E+00 -.37930690889350E-01 -.69377824108855E-02
 c  -.70500934388454E+00 0.95897456929254E+00 0.10965683505423E-01
 n  -.19350364133620E+01 0.42783544580135E+00 0.24878231086982E-01
 n  0.16015066677616E+01 0.22868194547633E+00 -.35046620406624E-01
 c  0.20762954161912E+01 0.15300303182937E+01 0.12211811382196E+00
 n  0.11019375820953E+01 0.24892901114268E+01 -.36401854046707E-01
 c  -.20017740925325E+00 0.23045969361631E+01 -.16746694084512E-01
 n  -.10743631882086E+01 0.33523289664291E+01 -.58626919136483E-01
 h  0.31036692344832E+01 0.17526911404396E+01 -.10997823344284E+00
 h  -.20235564400964E+01 0.31184194549493E+01 0.19120658946364E+00
 h  -.73058027895122E+00 0.42539789330616E+01 0.23027128061862E+00
 h  -.25112524528488E+01 -.16623122868592E+01 0.38596311481940E-01
 c  0.99042957290847E-01 -.25687816378602E+01 -.36970726660337E-02
 c  0.15918878397099E+01 -.27022472243738E+01 -.18768403042971E-01
 h  0.18399078046240E+01 -.37587482430027E+01 -.23293136309272E-01
 h  0.20118953109952E+01 -.22027559896996E+01 -.89210194311718E+00
 h  0.20248187318780E+01 -.22193941194687E+01 0.85879413694483E+00
 o  -.69868340074411E+00 -.34975383382645E+01 0.10211410272165E-02
    20

 c  -.17571736020516E+01 -.89162883790944E+00 0.25170752841444E-01
 n  -.37982718300876E+00 -.12404352626094E+01 -.85634386860545E-02
 c  0.32171220819456E+00 -.36186794847283E-01 -.26735190215776E-01
 c  -.70247796687152E+00 0.95872801767481E+00 -.72819992959029E-02
 n  -.19349749228413E+01 0.42702299286811E+00 0.24605164839509E-01
 n  0.16070211557942E+01 0.22659162235960E+00 -.39736580538978E-01
 c  0.20781506004201E+01 0.15290865124816E+01 0.14816384273199E+00
 n  0.10987050936195E+01 0.24845832340159E+01 -.24609670126617E-01
 c  -.20211240916519E+00 0.23042142745010E+01 -.13775419373902E-01
 n  -.10753001650858E+01 0.33566456663381E+01 -.72101042094857E-01
 h  0.30952901711504E+01 0.17568484724129E+01 -.12142235648238E+00
 h  -.20084639051936E+01 0.31099728275788E+01 0.22512751528342E+00
 h  -.72649408208956E+00 0.42314530137011E+01 0.28806936321797E+00
 h  -.25073014683109E+01 -.16602966608865E+01 0.52820060829846E-01
 c  0.97013861070350E-01 -.25685254125192E+01 -.30722559687656E-02
 c  0.15886564459174E+01 -.27064966456463E+01 -.36985678652881E-01
 h  0.18341718934412E+01 -.37634328540099E+01 -.29844718020532E-01
 h  0.19950685549180E+01 -.22207385835205E+01 -.92411016384334E+00
 h  0.20361539232506E+01 -.22101533339104E+01 0.82464328443602E+00
 o  -.70398364879367E+00 -.34932002273509E+01 0.21371244359441E-01
    20

 c  -.17592418577702E+01 -.89317157444979E+00 0.17683910240487E-01
 n  -.38086720806581E+00 -.12412665581278E+01 -.67985149142908E-02
 c  0.31968435207146E+00 -.37693082008625E-01 -.89981742376571E-02
 c  -.70308537625192E+00 0.95837439546313E+00 0.41519720570964E-02
 n  -.19348390493142E+01 0.42818252845170E+00 0.18692713377443E-01
 n  0.16050556597332E+01 0.22765169075056E+00 -.38317097082086E-01
 c  0.20752318662852E+01 0.15306194786584E+01 0.13115451009432E+00
 n  0.11017845023654E+01 0.24887150973225E+01 -.32755528478905E-01
 c  -.20076061059563E+00 0.23043290963657E+01 -.17987678294824E-01
 n  -.10757003263457E+01 0.33548489205656E+01 -.59059509705661E-01
 h  0.31017194432936E+01 0.17577033295105E+01 -.97245827647292E-01
 h  -.20197303927024E+01 0.31193418227419E+01 0.20966493114972E+00
 h  -.72751153559062E+00 0.42469426218805E+01 0.25522170940143E+00
 h  -.25114346772130E+01 -.16597988568560E+01 0.33886013300493E-01
 c  0.97941727997419E-01 -.25690907745926E+01 -.32922114936674E-02
 c  0.15897758791930E+01 -.27052360667751E+01 -.29629173760218E-01
 h  0.18365684226417E+01 -.37621183577050E+01 -.32734501271109E-01
 h  0.20017638822372E+01 -.22129183159532E+01 -.91091252559912E+00
 h  0.20318480072029E+01 -.22158658025314E+01 0.83868350834732E+00
 o  -.70031880879337E+00 -.34975313361501E+01 0.14948101787664E-01
    20

 c  -.17616702648683E+01 -.89105490141582E+00 0.15272762251337E-01
 n  -.38290995560235E+00 -.12386587012809E+01 -.58985716005989E-02
 c  0.31722803401847E+00 -.36467058481683E-01 -.14412777047150E-01
 c  -.70374376232352E+00 0.95867118783181E+00 -.38187435712252E-02
 n  -.19370622609106E+01 0.42992373309324E+00 0.13404543401992E-01
 n  0.16049954534956E+01 0.22198104390513E+00 -.42809793650738E-01
 c  0.20780495730867E+01 0.15250455353634E+01 0.13357458665048E+00
 n  0.11035554322477E+01 0.24800671269537E+01 -.29776930284383E-01
 c  -.19971207024595E+00 0.23044086667941E+01 -.18600416319180E-01
 n  -.10710704654083E+01 0.33610233539683E+01 -.54117159852559E-01
 h  0.31031683289477E+01 0.17548501947753E+01 -.98799750022022E-01
 h  -.20094391074613E+01 0.31248280636887E+01 0.23438816656373E+00
 h  -.71582597124210E+00 0.42407874185217E+01 0.28734432618963E+00
 h  -.25146965762071E+01 -.16567335350817E+01 0.25919366877712E-01
 c  0.96889909782443E-01 -.25673760507301E+01 -.13434062794577E-02
 c  0.15882071813468E+01 -.27026938135106E+01 -.30388119100123E-01
 h  0.18358629093990E+01 -.37594347406842E+01 -.29146957683638E-01
 h  0.19974844619955E+01 -.22170197428457E+01 -.91676115945827E+00
 h  0.20316364052682E+01 -.22052007424690E+01 0.83249104840151E+00
 o  -.69985183935180E+00 -.34965660059928E+01 0.22948306269138E-01
    20

 c  -.17610334692624E+01 -.89134665022406E+00 0.17689670289341E-01
 n  -.38237938590150E+00 -.12391726547036E+01 -.54883982588573E-02
 c  0.31715848848605E+00 -.36911143633008E-01 -.19507171391748E-01
 c  -.70340298159428E+00 0.95882869356956E+00 -.10734025645715E-01
 n  -.19361546676827E+01 0.43034122906581E+00 0.11419379099345E-01
 n  0.16051109604907E+01 0.22189478163939E+00 -.44296441415818E-01
 c  0.20763262131749E+01 0.15247378207720E+01 0.13256149252617E+00
 n  0.11035952204404E+01 0.24803221713914E+01 -.24931218455553E-01
 c  -.19958135847261E+00 0.23049860026834E+01 -.18830977407491E-01
 n  -.10708136405211E+01 0.33606925393566E+01 -.50894069994605E-01
 h  0.31030283543979E+01 0.17552022546073E+01 -.93476648814790E-01
 h  -.20113326133503E+01 0.31232471537768E+01 0.22965798340000E+00
 h  -.71809052120625E+00 0.42415598905593E+01 0.29015779751052E+00
 h  -.25139562060980E+01 -.16571754491557E+01 0.30252436518905E-01
 c  0.97123213606243E-01 -.25676895522629E+01 -.18263979334172E-03
 c  0.15885201038790E+01 -.27029037024269E+01 -.30135105828958E-01
 h  0.18362828605818E+01 -.37595562281336E+01 -.34025283136024E-01
 h  0.19971246546653E+01 -.22126910227681E+01 -.91448252577530E+00
 h  0.20327287663803E+01 -.22096197796559E+01 0.83500001911100E+00
 o  -.70121625299949E+00 -.34956450976556E+01 0.25156717877426E-01
    20

 c  -.17612334822820E+01 -.89203246570644E+00 0.18370845045017E-01
 n  -.38224893776974E+00 -.12394017016443E+01 -.38401623308300E-02
 c  0.31668260616885E+00 -.37126211669904E-01 -.15505392768527E-01
 c  -.70389699393401E+00 0.95859902837672E+00 -.87227926031761E-02
 n  -.19360848314734E+01 0.42983060395960E+00 0.11615322222250E-01
 n  0.16044921204283E+01 0.22235005680944E+00 -.42739783878570E-01
 c  0.20757813080152E+01 0.15257517297935E+01 0.12932305326693E+00
 n  0.11037140377950E+01 0.24808639035890E+01 -.28689662792847E-01
 c  -.19938904247994E+00 0.23049523716574E+01 -.19480875875862E-01
 n  -.10712611873529E+01 0.33601940609146E+01 -.50574180651368E-01
 h  0.31026162828907E+01 0.17548445378383E+01 -.97202582427673E-01
 h  -.20096746416056E+01 0.31205773046088E+01 0.23549648394017E+00
 h  -.71850269640551E+00 0.42398965878168E+01 0.29362181500951E+00
 h  -.25138564094907E+01 -.16582091516651E+01 0.28931809594814E-01
 c  0.97734307797228E-01 -.25677006216613E+01 -.63772315440971E-03
 c  0.15893063758468E+01 -.27022369591506E+01 -.26388112254621E-01
 h  0.18379321516692E+01 -.37585718483060E+01 -.32136115006097E-01
 h  0.19997723672455E+01 -.22092375706147E+01 -.90835257733462E+00
 h  0.20311281041095E+01 -.22112867199215E+01 0.84129751844416E+00
 o  -.70069678539676E+00 -.34956273240844E+01 0.19441917115063E-01
    20

 c  -.17611786899723E+01 -.89243011337409E+00 0.17907870867848E-01
 n  -.38187130440528E+00 -.12395627846568E+01 -.42190966456368E-02
 c  0.31685193113772E+00 -.37473317268880E-01 -.15391990975874E-01
 c  -.70415787944798E+00 0.95836738263732E+00 -.10127764712921E-01
 n  -.19357186821138E+01 0.42958088034494E+00 0.10399591085749E-01
 n  0.16043391347390E+01 0.22306764823443E+00 -.43698965576338E-01
 c  0.20755272080235E+01 0.15266108596026E+01 0.12631111455626E+00
 n  0.11036056770572E+01 0.24813405078401E+01 -.27876351276767E-01
 c  -.19937378003258E+00 0.23048884089754E+01 -.18817964252574E-01
 n  -.10717698610528E+01 0.33600762958848E+01 -.48670240263218E-01
 h  0.31027525243043E+01 0.17552656885994E+01 -.97380925842898E-01
 h  -.20093953716548E+01 0.31184412066099E+01 0.23852150958959E+00
 h  -.71974632857703E+00 0.42383789665665E+01 0.29989137114075E+00
 h  -.25134986527350E+01 -.16589555682434E+01 0.26123001729156E-01
 c  0.97890831175010E-01 -.25676909478739E+01 0.11827548968062E-03
 c  0.15895272856667E+01 -.27027447681378E+01 -.24195570892106E-01
 h  0.18377749504734E+01 -.37592752782227E+01 -.30319999190281E-01
 h  0.20011919283634E+01 -.22084194240180E+01 -.90477846696184E+00
 h  0.20306562043012E+01 -.22135669802735E+01 0.84483499062118E+00
 o  -.70077042641983E+00 -.34953129195085E+01 0.19206154728731E-01
    20

 c  -.17613470275810E+01 -.89254537814845E+00 0.16123973612668E-01
 n  -.38180402204529E+00 -.12396396577342E+01 -.58469135448098E-02
 c  0.31725347146609E+00 -.37999388045553E-01 -.16390345958786E-01
 c  -.70437802423421E+00 0.95853880615144E+00 -.13431800233810E-01
 n  -.19352496126633E+01 0.43005693294563E+00 0.74566416601368E-02
 n  0.16042672865842E+01 0.22326711018619E+00 -.43941640799630E-01
 c  0.20757775476124E+01 0.15267632172717E+01 0.12204338300129E+00
 n  0.11037745360055E+01 0.24814196431984E+01 -.24727959057971E-01
 c  -.19913610874336E+00 0.23049631128975E+01 -.16907173087902E-01
 n  -.10721210369311E+01 0.33609269357118E+01 -.46014532495908E-01
 h  0.31042106882744E+01 0.17543436680520E+01 -.95421692317103E-01
 h  -.20093605425340E+01 0.31174570596513E+01 0.24123740676820E+00
 h  -.72059496531687E+00 0.42365819385082E+01 0.30985382142918E+00
 h  -.25133932839779E+01 -.16592985279933E+01 0.21504705779165E-01
 c  0.97547895194068E-01 -.25676173573219E+01 0.12327406763286E-02
 c  0.15892318197125E+01 -.27033931647901E+01 -.24472388215257E-01
 h  0.18364900362212E+01 -.37601965004830E+01 -.30400776777609E-01
 h  0.20013786567278E+01 -.22082206596832E+01 -.90416480986238E+00
 h  0.20309126754042E+01 -.22161726019421E+01 0.84543260262722E+00
 o  -.70090857242730E+00 -.34955725586609E+01 0.23346139342242E-01
    20

 c  -.17620101503346E+01 -.89229621807603E+00 0.15411749084257E-01
 n  -.38242594859291E+00 -.12397256606159E+01 -.63316829542120E-02
 c  0.31699293592540E+00 -.38272223396366E-01 -.16399844560825E-01
 c  -.70448134257209E+00 0.95889419250390E+00 -.14569876618066E-01
 n  -.19351796484828E+01 0.43081602471764E+00 0.59921183348496E-02
 n  0.16038702678557E+01 0.22271102625466E+00 -.42372433426256E-01
 c  0.20758206988352E+01 0.15257869227940E+01 0.11934009542729E+00
 n  0.11043324083366E+01 0.24809660073804E+01 -.23913970843582E-01
 c  -.19872159948995E+00 0.23051545624565E+01 -.16154838576498E-01
 n  -.10715905731868E+01 0.33616185675965E+01 -.45020077482329E-01
 h  0.31055961182681E+01 0.17522320847771E+01 -.92818770543651E-01
 h  -.20085772799458E+01 0.31183366135890E+01 0.24322655223025E+00
 h  -.71928616188168E+00 0.42361213580829E+01 0.31305758225760E+00
 h  -.25144708363119E+01 -.16585139767985E+01 0.20921515723505E-01
 c  0.97393847543133E-01 -.25675465712823E+01 0.14870139022947E-02
 c  0.15891135948588E+01 -.27027873181888E+01 -.25129450816204E-01
 h  0.18366477822365E+01 -.37594675046911E+01 -.31099393835033E-01
 h  0.20011290269530E+01 -.22078103561001E+01 -.90501377614374E+00
 h  0.20306900253108E+01 -.22154502609457E+01 0.84484987968055E+00
 o  -.70053015113029E+00 -.34961112071277E+01 0.24938703212307E-01
    20

 c  -.17624287878217E+01 -.89245416884209E+00 0.14701458139527E-01
 n  -.38272764612731E+00 -.12401254190731E+01 -.65018954230196E-02
 c  0.31658816551161E+00 -.38525071765375E-01 -.16204834559965E-01
 c  -.70465386587687E+00 0.95898264045772E+00 -.14754321087991E-01
 n  -.19350171554818E+01 0.43101303365405E+00 0.52086438205552E-02
 n  0.16034012461806E+01 0.22293696748895E+00 -.41296491311436E-01
 c  0.20754649100259E+01 0.15254090211353E+01 0.11557169647357E+00
 n  0.11045566843572E+01 0.24808105556793E+01 -.23525511609683E-01
 c  -.19853510163021E+00 0.23053268135816E+01 -.15480535883156E-01
 n  -.10712501833357E+01 0.33619726860090E+01 -.44027428499192E-01
 h  0.31063536251826E+01 0.17514557761738E+01 -.90903889430722E-01
 h  -.20074769089165E+01 0.31188846685979E+01 0.24702721773057E+00
 h  -.71797061084544E+00 0.42358739079804E+01 0.31471646133331E+00
 h  -.25154861977402E+01 -.16580127346324E+01 0.20360330192693E-01
 c  0.97657602469592E-01 -.25676552601277E+01 0.17687415638970E-02
 c  0.15894148278812E+01 -.27023162544855E+01 -.23620188344978E-01
 h  0.18374922076415E+01 -.37588432317563E+01 -.29837105026498E-01
 h  0.20021993795844E+01 -.22078959258812E+01 -.90354828300912E+00
 h  0.20298577481232E+01 -.22142956468986E+01 0.84657961262450E+00
 o  -.70024556271286E+00 -.34962893819548E+01 0.24416094094950E-01
    20

 c  -.17622094528564E+01 -.89289731173976E+00 0.14411832436676E-01
 n  -.38243067495511E+00 -.12404942476363E+01 -.63783204791720E-02
 c  0.31661123024677E+00 -.38617852324054E-01 -.16262235752913E-01
 c  -.70476021290516E+00 0.95879185856973E+00 -.14501886817060E-01
 n  -.19348007417326E+01 0.43070263632620E+00 0.52797913569142E-02
 n  0.16033151832016E+01 0.22380640587614E+00 -.41179223655977E-01
 c  0.20751724176167E+01 0.15260258200841E+01 0.11333196976834E+00
 n  0.11043452069335E+01 0.24812464679094E+01 -.22451594026141E-01
 c  -.19869972404962E+00 0.23053229435580E+01 -.15034870228192E-01
 n  -.10716712932106E+01 0.33618287614516E+01 -.44299102395268E-01
 h  0.31063601893773E+01 0.17527946605178E+01 -.89781434843252E-01
 h  -.20073252241097E+01 0.31186546128292E+01 0.24863592227254E+00
 h  -.71833507168311E+00 0.42359574128645E+01 0.31386509464702E+00
 h  -.25154201707327E+01 -.16583323529366E+01 0.20155170627376E-01
 c  0.97856601799444E-01 -.25678129219701E+01 0.20023532981899E-02
 c  0.15896156913156E+01 -.27025271970801E+01 -.22652132230628E-01
 h  0.18377161368717E+01 -.37591332385823E+01 -.28230983292294E-01
 h  0.20026833922440E+01 -.22092434796275E+01 -.90311358407365E+00
 h  0.20299015368186E+01 -.22134457013554E+01 0.84696658477726E+00
 o  -.70016354810179E+00 -.34963547508222E+01 0.23697918968780E-01
    20

 c  -.17620461882838E+01 -.89311992721109E+00 0.14159426520808E-01
 n  -.38224807161255E+00 -.12406157074102E+01 -.61710740176297E-02
 c  0.31674778458027E+00 -.38656030685641E-01 -.16096742758462E-01
 c  -.70478907654427E+00 0.95873171786514E+00 -.13725249984495E-01
 n  -.19346673474019E+01 0.43064084917738E+00 0.56279037872317E-02
 n  0.16032693405918E+01 0.22424937090023E+00 -.40857792899408E-01
 c  0.20752674159344E+01 0.15263617801003E+01 0.11221762659884E+00
 n  0.11042400460576E+01 0.24814841531933E+01 -.21168800072192E-01
 c  -.19872061236934E+00 0.23052927129949E+01 -.14719739122688E-01
 n  -.10721356301710E+01 0.33617731448950E+01 -.45604704525503E-01
 h  0.31064601435215E+01 0.17539722795869E+01 -.89464095682253E-01
 h  -.20074418170517E+01 0.31186579262512E+01 0.24862632450687E+00
 h  -.71891663081582E+00 0.42361997930957E+01 0.31198317541443E+00
 h  -.25151050405623E+01 -.16587267821528E+01 0.20403751834181E-01
 c  0.97805035169074E-01 -.25678699542237E+01 0.18102994775894E-02
 c  0.15896072251590E+01 -.27026696813382E+01 -.23030184878478E-01
 h  0.18376694121200E+01 -.37592742698954E+01 -.27484674684653E-01
 h  0.20023369990664E+01 -.22103320360531E+01 -.90416461319512E+00
 h  0.20303903130977E+01 -.22127581841882E+01 0.84584514674100E+00
 o  -.70010366212905E+00 -.34966109863754E+01 0.23633850148640E-01
    20

 c  -.17622491632053E+01 -.89306852705275E+00 0.14261817344090E-01
 n  -.38243541881103E+00 -.12406242320111E+01 -.58358157862055E-02
 c  0.31666738425398E+00 -.38769044397093E-01 -.15596762081180E-01
 c  -.70479572508857E+00 0.95881089669278E+00 -.13022957990591E-01
 n  -.19346323061655E+01 0.43085038971331E+00 0.59002966194965E-02
 n  0.16031326039182E+01 0.22403264098842E+00 -.40188450575125E-01
 c  0.20752712761301E+01 0.15260499414911E+01 0.11140477298324E+00
 n  0.11044219473367E+01 0.24814005015010E+01 -.20910301780030E-01
 c  -.19858365831324E+00 0.23053754287731E+01 -.14884168633865E-01
 n  -.10720536324686E+01 0.33619356837480E+01 -.46384996397875E-01
 h  0.31066835403543E+01 0.17538172374978E+01 -.89118548771758E-01
 h  -.20071413631885E+01 0.31190704175020E+01 0.24878998853710E+00
 h  -.71854663647031E+00 0.42363813895843E+01 0.31094655379858E+00
 h  -.25152674284254E+01 -.16586728411161E+01 0.21166814097922E-01
 c  0.97761121687178E-01 -.25678441945244E+01 0.15770999877939E-02
 c  0.15896171789382E+01 -.27024097893930E+01 -.23125689823578E-01
 h  0.18378843723235E+01 -.37589437930953E+01 -.26954388419125E-01
 h  0.20020040731498E+01 -.22104259990729E+01 -.90464745597477E+00
 h  0.20305505733918E+01 -.22120345295680E+01 0.84542602539751E+00
 o  -.69999288708034E+00 -.34968134652042E+01 0.22982273015807E-01
    20

 c  -.17623688149537E+01 -.89301896162976E+00 0.14134033641358E-01
 n  -.38250717034850E+00 -.12406088372078E+01 -.60166049203708E-02
 c  0.31660405486071E+00 -.38840835588833E-01 -.15697007697195E-01
 c  -.70480604632302E+00 0.95884985998670E+00 -.13043187396747E-01
 n  -.19346061355297E+01 0.43092426204027E+00 0.57632692573961E-02
 n  0.16030844156482E+01 0.22392627641911E+00 -.40149854858829E-01
 c  0.20751873452010E+01 0.15258858664850E+01 0.11133947179992E+00
 n  0.11044887709997E+01 0.24813290543029E+01 -.20720563008648E-01
 c  -.19853011171935E+00 0.23054085657122E+01 -.15070712930811E-01
 n  -.10718957753150E+01 0.33620086373973E+01 -.46233727031037E-01
 h  0.31067258775778E+01 0.17536641322583E+01 -.88558524080106E-01
 h  -.20069586009105E+01 0.31191055300127E+01 0.24900219890037E+00
 h  -.71825252005214E+00 0.42362114585353E+01 0.31158441755846E+00
 h  -.25153733995242E+01 -.16586112240266E+01 0.21253891767970E-01
 c  0.97797031148894E-01 -.25678388783428E+01 0.15570866039511E-02
 c  0.15896529396381E+01 -.27023871541479E+01 -.23274311469099E-01
 h  0.18379508113452E+01 -.37588979275287E+01 -.26936222747248E-01
 h  0.20017654685638E+01 -.22104810630949E+01 -.90498348052813E+00
 h  0.20308107967649E+01 -.22119423919842E+01 0.84513226416028E+00
 o  -.70002495356823E+00 -.34967260344538E+01 0.23374429972654E-01
